# Supplementary material
Source: PubMed Central journal article supplement (PMC8447850)
Supplement: NIHMS1717311-supplement-supplemental_table_1b.pdf [file NIHMS1717311-supplement-supplemental_table_1b.pdf]

**Table 1b.**

| Gene                                              | log2 RNA/z | Fold-difference / 4z |
|---------------------------------------------------|------------|----------------------|
| <b>Upregulated in association with LifeEvents</b> |            |                      |
| <i>NXT1</i>                                       | 0.3851     | 2.91                 |
| <i>IQCB1</i>                                      | 0.3773     | 2.85                 |
| <i>KCTD13</i>                                     | 0.3583     | 2.70                 |
| <i>LTF</i>                                        | 0.3511     | 2.65                 |
| <i>CHI3L1</i>                                     | 0.3458     | 2.61                 |
| <i>LINC00847</i>                                  | 0.3192     | 2.42                 |
| <i>PPRC1</i>                                      | 0.3180     | 2.42                 |
| <i>GDAP1</i>                                      | 0.3161     | 2.40                 |
| <i>DDX11</i>                                      | 0.3141     | 2.39                 |
| <i>SMG9</i>                                       | 0.3049     | 2.33                 |
| <i>LINC02210</i>                                  | 0.3041     | 2.32                 |
| <i>LCMT2</i>                                      | 0.3006     | 2.30                 |
| <i>HHAT</i>                                       | 0.3004     | 2.30                 |
| <i>TCF7L2</i>                                     | 0.2967     | 2.28                 |
| <i>MAPK6</i>                                      | 0.2965     | 2.28                 |
| <i>PHOSPHO1</i>                                   | 0.2950     | 2.27                 |
| <i>RPUSD2</i>                                     | 0.2918     | 2.25                 |
| <i>ZNF136</i>                                     | 0.2914     | 2.24                 |
| <i>DDX31</i>                                      | 0.2905     | 2.24                 |
| <i>ZNF548</i>                                     | 0.2888     | 2.23                 |
| <i>WDR5</i>                                       | 0.2831     | 2.19                 |
| <i>PCYOX1L</i>                                    | 0.2798     | 2.17                 |
| <i>SLC25A29</i>                                   | 0.2796     | 2.17                 |
| <i>EDC3</i>                                       | 0.2794     | 2.17                 |
| <i>LIMD1</i>                                      | 0.2790     | 2.17                 |
| <i>RFT1</i>                                       | 0.2786     | 2.17                 |
| <i>AGMAT</i>                                      | 0.2744     | 2.14                 |
| <i>CAAP1</i>                                      | 0.2739     | 2.14                 |
| <i>LMTK2</i>                                      | 0.2731     | 2.13                 |
| <i>LRR1</i>                                       | 0.2707     | 2.12                 |
| <i>NPTN-IT1</i>                                   | 0.2689     | 2.11                 |
| <i>RNU1-103P</i>                                  | 0.2642     | 2.08                 |
| <i>PILRB</i>                                      | 0.2617     | 2.07                 |
| <i>HP</i>                                         | 0.2610     | 2.06                 |
| <i>AC018647.2</i>                                 | 0.2606     | 2.06                 |
| <i>AC084033.1</i>                                 | 0.2601     | 2.06                 |
| <i>PROCA1</i>                                     | 0.2573     | 2.04                 |
| <i>ADGRE3</i>                                     | 0.2571     | 2.04                 |
| <i>SLAMF1</i>                                     | 0.2547     | 2.03                 |
| <i>MRPS18C</i>                                    | 0.2546     | 2.03                 |
| <i>TANGO6</i>                                     | 0.2535     | 2.02                 |
| <i>ZNF550</i>                                     | 0.2535     | 2.02                 |
| <i>ERLIN2</i>                                     | 0.2524     | 2.01                 |
| <i>AL359220.1</i>                                 | 0.2522     | 2.01                 |

|                        |        |      |
|------------------------|--------|------|
| <i>LSS</i>             | 0.2520 | 2.01 |
| <i>PTCRA</i>           | 0.2512 | 2.01 |
| <i>AP5M1</i>           | 0.2503 | 2.00 |
| <i>PTRH2</i>           | 0.2497 | 2.00 |
| <i>RNF123</i>          | 0.2488 | 1.99 |
| <i>NUAK2</i>           | 0.2486 | 1.99 |
| <i>MYO15B</i>          | 0.2462 | 1.98 |
| <i>OBSCN</i>           | 0.2452 | 1.97 |
| <i>ELMOD2</i>          | 0.2429 | 1.96 |
| <i>ZNF814</i>          | 0.2419 | 1.96 |
| <i>PIKFYVE</i>         | 0.2415 | 1.95 |
| <i>ATP9A</i>           | 0.2406 | 1.95 |
| <i>ZNF691</i>          | 0.2400 | 1.95 |
| <i>MBNL2</i>           | 0.2394 | 1.94 |
| <i>GMPPA</i>           | 0.2380 | 1.93 |
| <i>LRRC1</i>           | 0.2380 | 1.93 |
| <i>FBN2</i>            | 0.2372 | 1.93 |
| <i>IPP</i>             | 0.2364 | 1.93 |
| <i>SRP19</i>           | 0.2358 | 1.92 |
| <i>FAM96A</i>          | 0.2350 | 1.92 |
| <i>NADK2</i>           | 0.2342 | 1.91 |
| <i>C8orf82</i>         | 0.2334 | 1.91 |
| <i>NECTIN3</i>         | 0.2330 | 1.91 |
| <i>PCTP</i>            | 0.2329 | 1.91 |
| <i>MDS2</i>            | 0.2322 | 1.90 |
| <i>ZNF542P</i>         | 0.2320 | 1.90 |
| <i>DHX57</i>           | 0.2316 | 1.90 |
| <i>CARD6</i>           | 0.2310 | 1.90 |
| <i>METTL6</i>          | 0.2299 | 1.89 |
| <i>UNK</i>             | 0.2298 | 1.89 |
| <i>ENSG00000242463</i> | 0.2294 | 1.89 |
| <i>HIVEP1</i>          | 0.2290 | 1.89 |
| <i>MIATNB</i>          | 0.2290 | 1.89 |
| <i>IFI27</i>           | 0.2289 | 1.89 |
| <i>CASP7</i>           | 0.2262 | 1.87 |
| <i>TMEM184C</i>        | 0.2260 | 1.87 |
| <i>SMCR8</i>           | 0.2255 | 1.87 |
| <i>SYNGR1</i>          | 0.2254 | 1.87 |
| <i>TRMT1L</i>          | 0.2252 | 1.87 |
| <i>HLA-DQA2</i>        | 0.2241 | 1.86 |
| <i>OTUD6B</i>          | 0.2236 | 1.86 |
| <i>RNU1-67P</i>        | 0.2228 | 1.85 |
| <i>MTX2</i>            | 0.2223 | 1.85 |
| <i>MAN1B1-AS1</i>      | 0.2222 | 1.85 |
| <i>PCBP1-AS1</i>       | 0.2219 | 1.85 |
| <i>PIGQ</i>            | 0.2217 | 1.85 |
| <i>TSEN2</i>           | 0.2203 | 1.84 |
| <i>NBPF11</i>          | 0.2202 | 1.84 |

|            |        |      |
|------------|--------|------|
| ZIK1       | 0.2198 | 1.84 |
| KATNBL1    | 0.2195 | 1.84 |
| IGSF10     | 0.2195 | 1.84 |
| ZFY        | 0.2186 | 1.83 |
| N4BP2L1    | 0.2182 | 1.83 |
| DIEXF      | 0.2178 | 1.83 |
| TM2D2      | 0.2169 | 1.82 |
| MYO15A     | 0.2160 | 1.82 |
| NUDCD2     | 0.2159 | 1.82 |
| PEX12      | 0.2156 | 1.82 |
| MCM8       | 0.2152 | 1.82 |
| ZNF641     | 0.2147 | 1.81 |
| CNTROB     | 0.2143 | 1.81 |
| OGG1       | 0.2142 | 1.81 |
| WDR20      | 0.2141 | 1.81 |
| NKRF       | 0.2139 | 1.81 |
| ATG3       | 0.2134 | 1.81 |
| TMPRSS9    | 0.2121 | 1.80 |
| CYB5D2     | 0.2113 | 1.80 |
| PKD1       | 0.2112 | 1.80 |
| TRMT61A    | 0.2111 | 1.80 |
| SP3        | 0.2107 | 1.79 |
| GNPAT      | 0.2107 | 1.79 |
| EPOR       | 0.2107 | 1.79 |
| C9orf64    | 0.2105 | 1.79 |
| ZNF236     | 0.2104 | 1.79 |
| MCM2       | 0.2103 | 1.79 |
| PIK3C2B    | 0.2098 | 1.79 |
| AC093673.1 | 0.2095 | 1.79 |
| CELF5      | 0.2090 | 1.79 |
| BRAP       | 0.2085 | 1.78 |
| AKT3       | 0.2083 | 1.78 |
| SELENOI    | 0.2082 | 1.78 |
| LINC00294  | 0.2081 | 1.78 |
| MYOM1      | 0.2078 | 1.78 |
| LMF2       | 0.2076 | 1.78 |
| TNNI2      | 0.2073 | 1.78 |
| TAF12      | 0.2070 | 1.78 |
| NAB1       | 0.2067 | 1.77 |
| CUTC       | 0.2066 | 1.77 |
| UBAP1      | 0.2065 | 1.77 |
| ZNRF2      | 0.2064 | 1.77 |
| ZSCAN25    | 0.2061 | 1.77 |
| KANSL1-AS1 | 0.2061 | 1.77 |
| EEF1DP5    | 0.2059 | 1.77 |
| TOMM5      | 0.2050 | 1.77 |
| RGP1       | 0.2050 | 1.77 |
| C18orf21   | 0.2047 | 1.76 |

|                        |        |      |
|------------------------|--------|------|
| <i>MTHFSD</i>          | 0.2036 | 1.76 |
| <i>AC005839.1</i>      | 0.2036 | 1.76 |
| <i>SF3B3</i>           | 0.2033 | 1.76 |
| <i>SLC35A3</i>         | 0.2031 | 1.76 |
| <i>HACD2</i>           | 0.2029 | 1.76 |
| <i>FBXO45</i>          | 0.2025 | 1.75 |
| <i>ANO10</i>           | 0.2015 | 1.75 |
| <i>CARNMT1</i>         | 0.2006 | 1.74 |
| <i>ENSG00000273672</i> | 0.1995 | 1.74 |
| <i>SGK494</i>          | 0.1993 | 1.74 |
| <i>ATE1</i>            | 0.1991 | 1.74 |
| <i>LIPH</i>            | 0.1986 | 1.73 |
| <i>C7orf43</i>         | 0.1986 | 1.73 |
| <i>HSCB</i>            | 0.1985 | 1.73 |
| <i>MB21D1</i>          | 0.1984 | 1.73 |
| <i>CASC4</i>           | 0.1978 | 1.73 |
| <i>PRPS1</i>           | 0.1975 | 1.73 |
| <i>CYSLTR2</i>         | 0.1962 | 1.72 |
| <i>STRN4</i>           | 0.1958 | 1.72 |
| <i>TMEM79</i>          | 0.1957 | 1.72 |
| <i>PPID</i>            | 0.1957 | 1.72 |
| <i>GDPGP1</i>          | 0.1957 | 1.72 |
| <i>YY2</i>             | 0.1955 | 1.72 |
| <i>GRB14</i>           | 0.1953 | 1.72 |
| <i>BBS7</i>            | 0.1950 | 1.72 |
| <i>TMEM101</i>         | 0.1946 | 1.72 |
| <i>ATP6VOE2</i>        | 0.1942 | 1.71 |
| <i>NBL1</i>            | 0.1934 | 1.71 |
| <i>ZNF836</i>          | 0.1931 | 1.71 |
| <i>TSTD2</i>           | 0.1926 | 1.71 |
| <i>C11orf49</i>        | 0.1916 | 1.70 |
| <i>ZNF219</i>          | 0.1916 | 1.70 |
| <i>PRKY</i>            | 0.1911 | 1.70 |
| <i>TRIO</i>            | 0.1909 | 1.70 |
| <i>MICAL3</i>          | 0.1907 | 1.70 |
| <i>PRCC</i>            | 0.1906 | 1.70 |
| <i>KCTD18</i>          | 0.1906 | 1.70 |
| <i>PUDP</i>            | 0.1904 | 1.70 |
| <i>FAM219A</i>         | 0.1903 | 1.69 |
| <i>CPAMD8</i>          | 0.1898 | 1.69 |
| <i>ZNF785</i>          | 0.1895 | 1.69 |
| <i>ABL1</i>            | 0.1887 | 1.69 |
| <i>SLA2</i>            | 0.1886 | 1.69 |
| <i>SPOCD1</i>          | 0.1884 | 1.69 |
| <i>ACTR8</i>           | 0.1882 | 1.69 |
| <i>UAP1</i>            | 0.1881 | 1.68 |
| <i>MED9</i>            | 0.1876 | 1.68 |
| <i>COPS4</i>           | 0.1873 | 1.68 |

|                     |        |      |
|---------------------|--------|------|
| <i>KCTD9</i>        | 0.1872 | 1.68 |
| <i>TMEM63B</i>      | 0.1871 | 1.68 |
| <i>AC068152.1</i>   | 0.1871 | 1.68 |
| <i>ABCA5</i>        | 0.1870 | 1.68 |
| <i>Z99755.3</i>     | 0.1869 | 1.68 |
| <i>ZNF738</i>       | 0.1868 | 1.68 |
| <i>POLG</i>         | 0.1866 | 1.68 |
| <i>ARL2BP</i>       | 0.1862 | 1.68 |
| <i>ALS2CR12</i>     | 0.1861 | 1.68 |
| <i>GPN2</i>         | 0.1861 | 1.68 |
| <i>SNCA</i>         | 0.1860 | 1.67 |
| <i>NEIL1</i>        | 0.1854 | 1.67 |
| <i>TCEAL4</i>       | 0.1843 | 1.67 |
| <i>RBMXL1</i>       | 0.1842 | 1.67 |
| <i>AC007751.2</i>   | 0.1842 | 1.67 |
| <i>CYP2E1</i>       | 0.1839 | 1.66 |
| <i>UROS</i>         | 0.1838 | 1.66 |
| <i>ABHD4</i>        | 0.1837 | 1.66 |
| <i>CXCL3</i>        | 0.1833 | 1.66 |
| <i>RABGGTA</i>      | 0.1831 | 1.66 |
| <i>AP001462.1</i>   | 0.1831 | 1.66 |
| <i>SH2B2</i>        | 0.1828 | 1.66 |
| <i>CCDC153</i>      | 0.1827 | 1.66 |
| <i>WDR81</i>        | 0.1824 | 1.66 |
| <i>VPS13B</i>       | 0.1816 | 1.65 |
| <i>ACSM4</i>        | 0.1805 | 1.65 |
| <i>HPCAL4</i>       | 0.1805 | 1.65 |
| <i>CHST11</i>       | 0.1802 | 1.65 |
| <i>RABGEF1</i>      | 0.1799 | 1.65 |
| <i>LINC00662</i>    | 0.1796 | 1.65 |
| <i>C22orf29</i>     | 0.1794 | 1.64 |
| <i>FAM220A</i>      | 0.1790 | 1.64 |
| <i>RGS12</i>        | 0.1790 | 1.64 |
| <i>KIAA1671</i>     | 0.1788 | 1.64 |
| <i>MBTD1</i>        | 0.1786 | 1.64 |
| <i>CKB</i>          | 0.1785 | 1.64 |
| <i>ARHGAP17</i>     | 0.1783 | 1.64 |
| <i>BATF2</i>        | 0.1775 | 1.64 |
| <i>PRR11</i>        | 0.1775 | 1.64 |
| <i>SERPINB8</i>     | 0.1774 | 1.64 |
| <i>BCL7A</i>        | 0.1773 | 1.64 |
| <i>CCNG2</i>        | 0.1772 | 1.63 |
| <i>PRIM2</i>        | 0.1771 | 1.63 |
| <i>WASHC3</i>       | 0.1771 | 1.63 |
| <i>PPP1R12A-AS1</i> | 0.1767 | 1.63 |
| <i>NMRAL1</i>       | 0.1766 | 1.63 |
| <i>FO393401.1</i>   | 0.1766 | 1.63 |
| <i>WTIP</i>         | 0.1765 | 1.63 |

|                   |        |      |
|-------------------|--------|------|
| <i>PCID2</i>      | 0.1763 | 1.63 |
| <i>ASB16-AS1</i>  | 0.1760 | 1.63 |
| <i>NLRC4</i>      | 0.1760 | 1.63 |
| <i>LSM1</i>       | 0.1759 | 1.63 |
| <i>AC015871.3</i> | 0.1757 | 1.63 |
| <i>SENP1</i>      | 0.1757 | 1.63 |
| <i>WIPI1</i>      | 0.1756 | 1.63 |
| <i>FPR2</i>       | 0.1753 | 1.63 |
| <i>CCDC6</i>      | 0.1752 | 1.63 |
| <i>IGHGP</i>      | 0.1751 | 1.63 |
| <i>PASK</i>       | 0.1751 | 1.62 |
| <i>PCYT2</i>      | 0.1749 | 1.62 |
| <i>LACTB2</i>     | 0.1746 | 1.62 |
| <i>INTS11</i>     | 0.1745 | 1.62 |
| <i>CCZ1B</i>      | 0.1744 | 1.62 |
| <i>HIST3H2A</i>   | 0.1744 | 1.62 |
| <i>TCN1</i>       | 0.1743 | 1.62 |
| <i>TRIM52</i>     | 0.1741 | 1.62 |
| <i>OCEL1</i>      | 0.1740 | 1.62 |
| <i>SRGAP2</i>     | 0.1738 | 1.62 |
| <i>SLC36A1</i>    | 0.1737 | 1.62 |
| <i>SMYD4</i>      | 0.1736 | 1.62 |
| <i>ZSCAN29</i>    | 0.1734 | 1.62 |
| <i>TCF20</i>      | 0.1731 | 1.62 |
| <i>GPD1L</i>      | 0.1729 | 1.62 |
| <i>ASB7</i>       | 0.1728 | 1.61 |
| <i>C11orf68</i>   | 0.1726 | 1.61 |
| <i>UTY</i>        | 0.1726 | 1.61 |
| <i>SLC26A2</i>    | 0.1725 | 1.61 |
| <i>ITGA10</i>     | 0.1725 | 1.61 |
| <i>AC004494.1</i> | 0.1724 | 1.61 |
| <i>MORC2</i>      | 0.1723 | 1.61 |
| <i>BIRC5</i>      | 0.1723 | 1.61 |
| <i>MYLK3</i>      | 0.1719 | 1.61 |
| <i>ZNF621</i>     | 0.1717 | 1.61 |
| <i>HIP1R</i>      | 0.1716 | 1.61 |
| <i>TPST1</i>      | 0.1713 | 1.61 |
| <i>MOV10</i>      | 0.1711 | 1.61 |
| <i>PSMD5-AS1</i>  | 0.1701 | 1.60 |
| <i>PPM1N</i>      | 0.1701 | 1.60 |
| <i>ABHD10</i>     | 0.1700 | 1.60 |
| <i>PCAT1</i>      | 0.1696 | 1.60 |
| <i>BCL2L13</i>    | 0.1693 | 1.60 |
| <i>SEMA7A</i>     | 0.1692 | 1.60 |
| <i>GRPEL1</i>     | 0.1692 | 1.60 |
| <i>IFI30</i>      | 0.1692 | 1.60 |
| <i>ABCC4</i>      | 0.1691 | 1.60 |
| <i>ABHD13</i>     | 0.1688 | 1.60 |

|                   |        |      |
|-------------------|--------|------|
| <i>MYH11</i>      | 0.1688 | 1.60 |
| <i>ST7</i>        | 0.1688 | 1.60 |
| <i>ACP1</i>       | 0.1687 | 1.60 |
| <i>MDM1</i>       | 0.1685 | 1.60 |
| <i>FAM210A</i>    | 0.1682 | 1.59 |
| <i>MARCH2</i>     | 0.1681 | 1.59 |
| <i>BCYRN1</i>     | 0.1680 | 1.59 |
| <i>RRM1</i>       | 0.1676 | 1.59 |
| <i>CLSPN</i>      | 0.1676 | 1.59 |
| <i>MKRN2</i>      | 0.1675 | 1.59 |
| <i>SIGLEC8</i>    | 0.1675 | 1.59 |
| <i>SLC16A10</i>   | 0.1673 | 1.59 |
| <i>APOBEC3F</i>   | 0.1672 | 1.59 |
| <i>ENDOV</i>      | 0.1672 | 1.59 |
| <i>AL365357.1</i> | 0.1671 | 1.59 |
| <i>AC007342.1</i> | 0.1670 | 1.59 |
| <i>AC079416.2</i> | 0.1668 | 1.59 |
| <i>DLX3</i>       | 0.1664 | 1.59 |
| <i>C1RL-AS1</i>   | 0.1659 | 1.58 |
| <i>C3orf33</i>    | 0.1657 | 1.58 |
| <i>NIPSNAP1</i>   | 0.1654 | 1.58 |
| <i>SWSAP1</i>     | 0.1652 | 1.58 |
| <i>TP53BP2</i>    | 0.1649 | 1.58 |
| <i>ABHD18</i>     | 0.1649 | 1.58 |
| <i>BCAS4</i>      | 0.1646 | 1.58 |
| <i>PRR14</i>      | 0.1646 | 1.58 |
| <i>FAM35A</i>     | 0.1646 | 1.58 |
| <i>AL365203.1</i> | 0.1644 | 1.58 |
| <i>PEX11B</i>     | 0.1643 | 1.58 |
| <i>PYHIN1</i>     | 0.1641 | 1.58 |
| <i>ESR2</i>       | 0.1638 | 1.57 |
| <i>SCAF4</i>      | 0.1636 | 1.57 |
| <i>SCNN1D</i>     | 0.1634 | 1.57 |
| <i>KLF1</i>       | 0.1630 | 1.57 |
| <i>CLCN4</i>      | 0.1625 | 1.57 |
| <i>PSMB3</i>      | 0.1625 | 1.57 |
| <i>NT5M</i>       | 0.1625 | 1.57 |
| <i>ORAI3</i>      | 0.1624 | 1.57 |
| <i>AC021078.1</i> | 0.1622 | 1.57 |
| <i>AL844908.1</i> | 0.1620 | 1.57 |
| <i>MPDU1</i>      | 0.1618 | 1.57 |
| <i>BCL2A1</i>     | 0.1618 | 1.57 |
| <i>CPSF6</i>      | 0.1617 | 1.57 |
| <i>TIGIT</i>      | 0.1616 | 1.57 |
| <i>ANKUB1</i>     | 0.1614 | 1.56 |
| <i>ZC3H18</i>     | 0.1612 | 1.56 |
| <i>MAN1A1</i>     | 0.1611 | 1.56 |
| <i>AC024909.3</i> | 0.1609 | 1.56 |

|                   |        |      |
|-------------------|--------|------|
| <i>PHF13</i>      | 0.1609 | 1.56 |
| <i>RILP</i>       | 0.1609 | 1.56 |
| <i>ZNRD1</i>      | 0.1608 | 1.56 |
| <i>PTPN11</i>     | 0.1607 | 1.56 |
| <i>ADA</i>        | 0.1607 | 1.56 |
| <i>SLC2A5</i>     | 0.1605 | 1.56 |
| <i>SLC30A9</i>    | 0.1605 | 1.56 |
| <i>PNRC2</i>      | 0.1604 | 1.56 |
| <i>PELI2</i>      | 0.1604 | 1.56 |
| <i>ZEB1</i>       | 0.1601 | 1.56 |
| <i>BIVM</i>       | 0.1601 | 1.56 |
| <i>KLHL7</i>      | 0.1600 | 1.56 |
| <i>MBTPS2</i>     | 0.1598 | 1.56 |
| <i>HILPDA</i>     | 0.1598 | 1.56 |
| <i>GSK3A</i>      | 0.1598 | 1.56 |
| <i>GFI1</i>       | 0.1597 | 1.56 |
| <i>RFC5</i>       | 0.1596 | 1.56 |
| <i>DPEP3</i>      | 0.1596 | 1.56 |
| <i>CLEC4D</i>     | 0.1596 | 1.56 |
| <i>AC079922.2</i> | 0.1595 | 1.56 |
| <i>PRICKLE1</i>   | 0.1591 | 1.55 |
| <i>CUX2</i>       | 0.1587 | 1.55 |
| <i>PIGA</i>       | 0.1587 | 1.55 |
| <i>HPS5</i>       | 0.1586 | 1.55 |
| <i>COG3</i>       | 0.1585 | 1.55 |
| <i>LINC00954</i>  | 0.1583 | 1.55 |
| <i>AMER1</i>      | 0.1583 | 1.55 |
| <i>SCARNA5</i>    | 0.1581 | 1.55 |
| <i>NFKBID</i>     | 0.1581 | 1.55 |
| <i>CAPRIN2</i>    | 0.1580 | 1.55 |
| <i>KDM5D</i>      | 0.1577 | 1.55 |
| <i>PAXIP1</i>     | 0.1577 | 1.55 |
| <i>TAX1BP3</i>    | 0.1577 | 1.55 |
| <i>RNF14</i>      | 0.1576 | 1.55 |
| <i>AC026979.3</i> | 0.1576 | 1.55 |
| <i>Y_RNA</i>      | 0.1575 | 1.55 |
| <i>NDUFC2</i>     | 0.1574 | 1.55 |
| <i>HGD</i>        | 0.1573 | 1.55 |
| <i>FHIT</i>       | 0.1573 | 1.55 |
| <i>AC021016.2</i> | 0.1569 | 1.55 |
| <i>PHC1</i>       | 0.1569 | 1.55 |
| <i>NDUFC1</i>     | 0.1567 | 1.54 |
| <i>SIMC1</i>      | 0.1565 | 1.54 |
| <i>TMEM80</i>     | 0.1565 | 1.54 |
| <i>ZZZ3</i>       | 0.1564 | 1.54 |
| <i>SLC25A26</i>   | 0.1564 | 1.54 |
| <i>WDR74</i>      | 0.1563 | 1.54 |
| <i>ZNHIT1</i>     | 0.1563 | 1.54 |



|                   |        |      |
|-------------------|--------|------|
| <i>MARCH9</i>     | 0.1562 | 1.54 |
| <i>AL158206.1</i> | 0.1561 | 1.54 |
| <i>CD2AP</i>      | 0.1561 | 1.54 |
| <i>IL10RB-AS1</i> | 0.1560 | 1.54 |
| <i>BRF2</i>       | 0.1560 | 1.54 |
| <i>CLN5</i>       | 0.1559 | 1.54 |
| <i>PFKFB3</i>     | 0.1559 | 1.54 |
| <i>AF131215.4</i> | 0.1558 | 1.54 |
| <i>CYP4F12</i>    | 0.1557 | 1.54 |
| <i>ELOVL7</i>     | 0.1556 | 1.54 |
| <i>WDR12</i>      | 0.1553 | 1.54 |
| <i>SGSM3</i>      | 0.1553 | 1.54 |
| <i>LGR6</i>       | 0.1553 | 1.54 |
| <i>STARD10</i>    | 0.1549 | 1.54 |
| <i>DVL1</i>       | 0.1545 | 1.53 |
| <i>LINC00641</i>  | 0.1544 | 1.53 |
| <i>FLVCR1-AS1</i> | 0.1542 | 1.53 |
| <i>ZNF862</i>     | 0.1542 | 1.53 |
| <i>P2RX1</i>      | 0.1542 | 1.53 |
| <i>CHMP7</i>      | 0.1539 | 1.53 |
| <i>CETN2</i>      | 0.1539 | 1.53 |
| <i>MIS12</i>      | 0.1536 | 1.53 |
| <i>KLF9</i>       | 0.1536 | 1.53 |
| <i>MAG11</i>      | 0.1535 | 1.53 |
| <i>TRAF7</i>      | 0.1534 | 1.53 |
| <i>LINC01278</i>  | 0.1533 | 1.53 |
| <i>TTF2</i>       | 0.1532 | 1.53 |
| <i>DAPK1</i>      | 0.1531 | 1.53 |
| <i>MAD2L1BP</i>   | 0.1530 | 1.53 |
| <i>ZNF511</i>     | 0.1530 | 1.53 |
| <i>SFXN1</i>      | 0.1526 | 1.53 |
| <i>ENO3</i>       | 0.1525 | 1.53 |
| <i>DNAAF5</i>     | 0.1525 | 1.53 |
| <i>BCR</i>        | 0.1523 | 1.53 |
| <i>LINS1</i>      | 0.1519 | 1.52 |
| <i>LINC02273</i>  | 0.1519 | 1.52 |
| <i>FOXB1</i>      | 0.1518 | 1.52 |
| <i>KLHL5</i>      | 0.1518 | 1.52 |
| <i>CLPB</i>       | 0.1518 | 1.52 |
| <i>SEC13</i>      | 0.1517 | 1.52 |
| <i>SFXN4</i>      | 0.1515 | 1.52 |
| <i>SIGLEC5</i>    | 0.1515 | 1.52 |
| <i>HMBOX1-IT1</i> | 0.1513 | 1.52 |
| <i>SGMS1-AS1</i>  | 0.1513 | 1.52 |
| <i>ZNF879</i>     | 0.1512 | 1.52 |
| <i>SESN1</i>      | 0.1512 | 1.52 |
| <i>L3HYPDH</i>    | 0.1508 | 1.52 |
| <i>ZBTB10</i>     | 0.1507 | 1.52 |

|                   |        |       |
|-------------------|--------|-------|
| <i>NDUFB5</i>     | 0.1507 | 1.52  |
| <i>RPSAP43</i>    | 0.1506 | 1.52  |
| <i>CYTH2</i>      | 0.1505 | 1.52  |
| <i>AP000692.1</i> | 0.1501 | 1.52  |
| <i>BCAT2</i>      | 0.1498 | 1.51  |
| <i>SNAI3</i>      | 0.1496 | 1.51  |
| <i>UBR1</i>       | 0.1495 | 1.51  |
| <i>AC015819.1</i> | 0.1495 | 1.51  |
| <i>AC025449.1</i> | 0.1494 | 1.51  |
| <i>FBXL3</i>      | 0.1492 | 1.51  |
| <i>NF2</i>        | 0.1491 | 1.51  |
| <i>PAPPA</i>      | 0.1490 | 1.51  |
| <i>FADD</i>       | 0.1490 | 1.51  |
| <i>NBPF14</i>     | 0.1488 | 1.51  |
| <i>BTBD11</i>     | 0.1485 | 1.51  |
| <i>SEPSECS</i>    | 0.1485 | 1.509 |
| <i>DEPDC5</i>     | 0.1483 | 1.509 |
| <i>DNAJC24</i>    | 0.1481 | 1.508 |
| <i>PLEKHG2</i>    | 0.1481 | 1.508 |
| <i>LZTS2</i>      | 0.1481 | 1.508 |
| <i>SLC9A9</i>     | 0.1480 | 1.507 |
| <i>PRKCE</i>      | 0.1479 | 1.507 |
| <i>LINC00672</i>  | 0.1478 | 1.507 |
| <i>HIST1H4H</i>   | 0.1478 | 1.506 |
| <i>FANCA</i>      | 0.1477 | 1.506 |
| <i>ASMTL</i>      | 0.1474 | 1.505 |
| <i>CDH13</i>      | 0.1474 | 1.505 |
| <i>CCT6B</i>      | 0.1474 | 1.505 |
| <i>LGMN</i>       | 0.1473 | 1.504 |
| <i>AC005072.1</i> | 0.1473 | 1.504 |
| <i>TTL</i>        | 0.1471 | 1.504 |
| <i>AC027644.3</i> | 0.1470 | 1.503 |
| <i>ERVK13-1</i>   | 0.1469 | 1.503 |
| <i>ABHD6</i>      | 0.1469 | 1.503 |
| <i>ADM</i>        | 0.1467 | 1.502 |

**Downregulated in association with LifeEvents**

|                |         |       |
|----------------|---------|-------|
| <i>ZBTB5</i>   | -0.1463 | 0.667 |
| <i>TPRKB</i>   | -0.1463 | 0.666 |
| <i>TCEAL1</i>  | -0.1465 | 0.666 |
| <i>TRIM7</i>   | -0.1465 | 0.666 |
| <i>CAMSAP1</i> | -0.1466 | 0.666 |
| <i>FOXK2</i>   | -0.1467 | 0.666 |
| <i>CLUAP1</i>  | -0.1467 | 0.666 |
| <i>CXorf21</i> | -0.1467 | 0.666 |
| <i>MTRF1</i>   | -0.1467 | 0.666 |
| <i>ETAA1</i>   | -0.1468 | 0.666 |
| <i>TRPC4AP</i> | -0.1469 | 0.666 |

|                    |         |       |
|--------------------|---------|-------|
| <i>SLAMF7</i>      | -0.1469 | 0.665 |
| <i>IDNK</i>        | -0.1470 | 0.665 |
| <i>CD99L2</i>      | -0.1470 | 0.665 |
| <i>MCTS1</i>       | -0.1470 | 0.665 |
| <i>STARD4</i>      | -0.1471 | 0.665 |
| <i>TUBGCP6</i>     | -0.1472 | 0.665 |
| <i>HSPA14</i>      | -0.1473 | 0.665 |
| <i>CLDN15</i>      | -0.1474 | 0.665 |
| <i>CSTF1</i>       | -0.1474 | 0.665 |
| <i>U73169.1</i>    | -0.1476 | 0.664 |
| <i>WASHC5</i>      | -0.1477 | 0.664 |
| <i>SERPINB6</i>    | -0.1479 | 0.664 |
| <i>ZSWIM6</i>      | -0.1479 | 0.664 |
| <i>LMAN2L</i>      | -0.1479 | 0.664 |
| <i>AGPAT1</i>      | -0.1480 | 0.663 |
| <i>PATL2</i>       | -0.1480 | 0.663 |
| <i>BLMH</i>        | -0.1481 | 0.663 |
| <i>AC099524.1</i>  | -0.1481 | 0.663 |
| <i>AKAP1</i>       | -0.1481 | 0.663 |
| <i>GNL1</i>        | -0.1482 | 0.663 |
| <i>ATP8B2</i>      | -0.1482 | 0.663 |
| <i>DNASE1L1</i>    | -0.1483 | 0.663 |
| <i>LMBR1L</i>      | -0.1485 | 0.663 |
| <i>TTC31</i>       | -0.1487 | 0.662 |
| <i>TRMT1</i>       | -0.1488 | 0.662 |
| <i>IFI27L1</i>     | -0.1489 | 0.662 |
| <i>PQBP1</i>       | -0.1489 | 0.662 |
| <i>SLC38A5</i>     | -0.1491 | 0.661 |
| <i>JUP</i>         | -0.1491 | 0.661 |
| <i>SCFD1</i>       | -0.1491 | 0.661 |
| <i>SYNJ2</i>       | -0.1493 | 0.661 |
| <i>FUOM</i>        | -0.1494 | 0.661 |
| <i>DLD</i>         | -0.1495 | 0.661 |
| <i>FBXO22</i>      | -0.1496 | 0.661 |
| <i>MYO1C</i>       | -0.1496 | 0.661 |
| <i>TMEM147-AS1</i> | -0.1496 | 0.660 |
| <i>POM121</i>      | -0.1497 | 0.660 |
| <i>ZNF524</i>      | -0.1498 | 0.660 |
| <i>ANAPC4</i>      | -0.1498 | 0.660 |
| <i>GNPNAT1</i>     | -0.1498 | 0.660 |
| <i>ZNF16</i>       | -0.1499 | 0.660 |
| <i>FBXW4</i>       | -0.1501 | 0.660 |
| <i>IPO7</i>        | -0.1501 | 0.660 |
| <i>C19orf68</i>    | -0.1502 | 0.659 |
| <i>ITK</i>         | -0.1503 | 0.659 |
| <i>EARS2</i>       | -0.1503 | 0.659 |
| <i>PATL1</i>       | -0.1503 | 0.659 |
| <i>BORA</i>        | -0.1506 | 0.659 |

|                   |         |       |
|-------------------|---------|-------|
| <i>SH3TC1</i>     | -0.1507 | 0.659 |
| <i>HEXIM1</i>     | -0.1507 | 0.659 |
| <i>BCL9L</i>      | -0.1507 | 0.658 |
| <i>SGO2</i>       | -0.1507 | 0.658 |
| <i>PJA1</i>       | -0.1508 | 0.658 |
| <i>ZNF224</i>     | -0.1509 | 0.658 |
| <i>PTPA</i>       | -0.1510 | 0.658 |
| <i>KEAP1</i>      | -0.1510 | 0.658 |
| <i>BMT2</i>       | -0.1510 | 0.658 |
| <i>FER</i>        | -0.1511 | 0.658 |
| <i>ST6GALNAC6</i> | -0.1511 | 0.658 |
| <i>DENND5A</i>    | -0.1511 | 0.658 |
| <i>FCHO1</i>      | -0.1511 | 0.658 |
| <i>SUMO1</i>      | -0.1512 | 0.658 |
| <i>NAXE</i>       | -0.1513 | 0.657 |
| <i>CLEC4A</i>     | -0.1514 | 0.657 |
| <i>CCDC77</i>     | -0.1515 | 0.657 |
| <i>GNG7</i>       | -0.1515 | 0.657 |
| <i>ATG13</i>      | -0.1518 | 0.657 |
| <i>SNRPG</i>      | -0.1519 | 0.656 |
| <i>AFF3</i>       | -0.1519 | 0.656 |
| <i>AL049840.4</i> | -0.1519 | 0.656 |
| <i>TADA2A</i>     | -0.1520 | 0.656 |
| <i>CUL1</i>       | -0.1520 | 0.656 |
| <i>TEX264</i>     | -0.1522 | 0.656 |
| <i>IFT46</i>      | -0.1524 | 0.655 |
| <i>DNAJC25</i>    | -0.1525 | 0.655 |
| <i>AMBRA1</i>     | -0.1525 | 0.655 |
| <i>POFUT2</i>     | -0.1525 | 0.655 |
| <i>PI4K2B</i>     | -0.1526 | 0.655 |
| <i>TEX10</i>      | -0.1529 | 0.655 |
| <i>ARHGAP35</i>   | -0.1530 | 0.654 |
| <i>PES1</i>       | -0.1531 | 0.654 |
| <i>CDKN2AIPNL</i> | -0.1531 | 0.654 |
| <i>MRPS6</i>      | -0.1531 | 0.654 |
| <i>UBE2E1</i>     | -0.1531 | 0.654 |
| <i>EXOC5</i>      | -0.1531 | 0.654 |
| <i>ESCO1</i>      | -0.1533 | 0.654 |
| <i>SMAD3</i>      | -0.1534 | 0.654 |
| <i>ABHD11</i>     | -0.1536 | 0.653 |
| <i>TCTEX1D2</i>   | -0.1538 | 0.653 |
| <i>AC138409.2</i> | -0.1539 | 0.653 |
| <i>RTCA</i>       | -0.1539 | 0.653 |
| <i>OGFOD1</i>     | -0.1539 | 0.653 |
| <i>CRLS1</i>      | -0.1540 | 0.653 |
| <i>AC060780.1</i> | -0.1540 | 0.653 |
| <i>MRPL15</i>     | -0.1540 | 0.652 |
| <i>MBOAT2</i>     | -0.1542 | 0.652 |

|                   |         |       |
|-------------------|---------|-------|
| <i>ME2</i>        | -0.1542 | 0.652 |
| <i>HPS6</i>       | -0.1542 | 0.652 |
| <i>ATP8B4</i>     | -0.1543 | 0.652 |
| <i>MYCL</i>       | -0.1543 | 0.652 |
| <i>RNF111</i>     | -0.1544 | 0.652 |
| <i>UMAD1</i>      | -0.1545 | 0.652 |
| <i>FOLR3</i>      | -0.1545 | 0.652 |
| <i>UGCG</i>       | -0.1547 | 0.651 |
| <i>TOR1B</i>      | -0.1547 | 0.651 |
| <i>CCDC124</i>    | -0.1548 | 0.651 |
| <i>AC009831.4</i> | -0.1548 | 0.651 |
| <i>TLDC1</i>      | -0.1549 | 0.651 |
| <i>AC010969.2</i> | -0.1552 | 0.650 |
| <i>UBE2Q1</i>     | -0.1553 | 0.650 |
| <i>AP3M2</i>      | -0.1553 | 0.650 |
| <i>ADHFE1</i>     | -0.1553 | 0.650 |
| <i>MTIF2</i>      | -0.1554 | 0.650 |
| <i>COPS2</i>      | -0.1555 | 0.650 |
| <i>USPL1</i>      | -0.1555 | 0.650 |
| <i>ZNF302</i>     | -0.1556 | 0.650 |
| <i>AC022182.2</i> | -0.1556 | 0.650 |
| <i>PNMA3</i>      | -0.1558 | 0.649 |
| <i>LARP1B</i>     | -0.1559 | 0.649 |
| <i>AP5S1</i>      | -0.1559 | 0.649 |
| <i>ATRN</i>       | -0.1562 | 0.649 |
| <i>MYSM1</i>      | -0.1563 | 0.648 |
| <i>SMARCB1</i>    | -0.1563 | 0.648 |
| <i>ABCF3</i>      | -0.1566 | 0.648 |
| <i>GSEC</i>       | -0.1566 | 0.648 |
| <i>KIFC3</i>      | -0.1566 | 0.648 |
| <i>ITM2A</i>      | -0.1568 | 0.647 |
| <i>UBE4B</i>      | -0.1569 | 0.647 |
| <i>AAMDC</i>      | -0.1571 | 0.647 |
| <i>RAB11FIP5</i>  | -0.1571 | 0.647 |
| <i>RMND1</i>      | -0.1571 | 0.647 |
| <i>C16orf70</i>   | -0.1572 | 0.647 |
| <i>NAA60</i>      | -0.1572 | 0.647 |
| <i>LSM4</i>       | -0.1573 | 0.647 |
| <i>MFGE8</i>      | -0.1573 | 0.647 |
| <i>USP6NL</i>     | -0.1574 | 0.646 |
| <i>SURF6</i>      | -0.1575 | 0.646 |
| <i>AC011374.2</i> | -0.1575 | 0.646 |
| <i>MLLT11</i>     | -0.1576 | 0.646 |
| <i>IL6ST</i>      | -0.1576 | 0.646 |
| <i>FN3KRP</i>     | -0.1578 | 0.646 |
| <i>HSPA9</i>      | -0.1579 | 0.645 |
| <i>DPP4</i>       | -0.1580 | 0.645 |
| <i>ZNF766</i>     | -0.1581 | 0.645 |

|                        |         |       |
|------------------------|---------|-------|
| <i>CDCA7L</i>          | -0.1582 | 0.645 |
| <i>RNF5</i>            | -0.1582 | 0.645 |
| <i>MYL6B</i>           | -0.1583 | 0.645 |
| <i>GCNT4</i>           | -0.1584 | 0.645 |
| <i>ZKSCAN5</i>         | -0.1586 | 0.644 |
| <i>CLK2</i>            | -0.1586 | 0.644 |
| <i>NMD3</i>            | -0.1588 | 0.644 |
| <i>RFX5</i>            | -0.1588 | 0.644 |
| <i>KRT23</i>           | -0.1590 | 0.644 |
| <i>ZBTB7B</i>          | -0.1591 | 0.643 |
| <i>PGGT1B</i>          | -0.1591 | 0.643 |
| <i>XYLT1</i>           | -0.1591 | 0.643 |
| <i>CHEK2</i>           | -0.1594 | 0.643 |
| <i>PCNT</i>            | -0.1595 | 0.643 |
| <i>PTRH1</i>           | -0.1595 | 0.643 |
| <i>RAD50</i>           | -0.1595 | 0.643 |
| <i>ZNF439</i>          | -0.1595 | 0.643 |
| <i>NIP7</i>            | -0.1596 | 0.642 |
| <i>TAF9B</i>           | -0.1597 | 0.642 |
| <i>RUNX1</i>           | -0.1599 | 0.642 |
| <i>ANKS3</i>           | -0.1599 | 0.642 |
| <i>IFITM1</i>          | -0.1602 | 0.641 |
| <i>SLFN11</i>          | -0.1602 | 0.641 |
| <i>TMEM120B</i>        | -0.1602 | 0.641 |
| <i>IFT172</i>          | -0.1603 | 0.641 |
| <i>DPM1</i>            | -0.1604 | 0.641 |
| <i>ZBTB39</i>          | -0.1608 | 0.640 |
| <i>NAA30</i>           | -0.1609 | 0.640 |
| <i>FTSJ3</i>           | -0.1609 | 0.640 |
| <i>ATG4D</i>           | -0.1613 | 0.639 |
| <i>AL160400.1</i>      | -0.1613 | 0.639 |
| <i>MILR1</i>           | -0.1615 | 0.639 |
| <i>TROVE2</i>          | -0.1615 | 0.639 |
| <i>BACH1</i>           | -0.1615 | 0.639 |
| <i>HOXB-AS1</i>        | -0.1619 | 0.638 |
| <i>RPS20P14</i>        | -0.1620 | 0.638 |
| <i>TRAT1</i>           | -0.1621 | 0.638 |
| <i>ARMC10</i>          | -0.1622 | 0.638 |
| <i>KDM6A</i>           | -0.1622 | 0.638 |
| <i>ENSG00000260837</i> | -0.1623 | 0.638 |
| <i>MAPK9</i>           | -0.1624 | 0.638 |
| <i>UQCRCF1</i>         | -0.1624 | 0.637 |
| <i>ZNF683</i>          | -0.1624 | 0.637 |
| <i>ZNF775</i>          | -0.1624 | 0.637 |
| <i>PHF8</i>            | -0.1625 | 0.637 |
| <i>TMEM123</i>         | -0.1627 | 0.637 |
| <i>VPS50</i>           | -0.1628 | 0.637 |
| <i>ZNF350</i>          | -0.1629 | 0.637 |

|                   |         |       |
|-------------------|---------|-------|
| <i>AC127521.1</i> | -0.1631 | 0.636 |
| <i>MPG</i>        | -0.1634 | 0.636 |
| <i>HCCS</i>       | -0.1635 | 0.636 |
| <i>YIF1A</i>      | -0.1636 | 0.635 |
| <i>AC108693.1</i> | -0.1637 | 0.635 |
| <i>CITED2</i>     | -0.1637 | 0.635 |
| <i>NPL</i>        | -0.1639 | 0.635 |
| <i>RRP1</i>       | -0.1640 | 0.635 |
| <i>NSDHL</i>      | -0.1641 | 0.634 |
| <i>AL357033.4</i> | -0.1642 | 0.634 |
| <i>NICN1</i>      | -0.1643 | 0.634 |
| <i>ZNF75D</i>     | -0.1644 | 0.634 |
| <i>CACYBP</i>     | -0.1644 | 0.634 |
| <i>AC005035.1</i> | -0.1644 | 0.634 |
| <i>HLCS</i>       | -0.1648 | 0.633 |
| <i>SPTY2D1</i>    | -0.1648 | 0.633 |
| <i>AGA</i>        | -0.1649 | 0.633 |
| <i>GPATCH11</i>   | -0.1649 | 0.633 |
| <i>TMED2</i>      | -0.1652 | 0.632 |
| <i>AC013264.1</i> | -0.1653 | 0.632 |
| <i>UVSSA</i>      | -0.1654 | 0.632 |
| <i>PTCH1</i>      | -0.1654 | 0.632 |
| <i>GXYLT1</i>     | -0.1654 | 0.632 |
| <i>SASS6</i>      | -0.1656 | 0.632 |
| <i>FUNDC1</i>     | -0.1656 | 0.632 |
| <i>RNF6</i>       | -0.1657 | 0.632 |
| <i>RPIA</i>       | -0.1657 | 0.632 |
| <i>ERMP1</i>      | -0.1658 | 0.631 |
| <i>CTSF</i>       | -0.1659 | 0.631 |
| <i>SNX9</i>       | -0.1660 | 0.631 |
| <i>CLECL1</i>     | -0.1660 | 0.631 |
| <i>COX20</i>      | -0.1665 | 0.630 |
| <i>ARMC7</i>      | -0.1667 | 0.630 |
| <i>BABAM2</i>     | -0.1668 | 0.630 |
| <i>ANGEL2</i>     | -0.1668 | 0.630 |
| <i>GCLM</i>       | -0.1669 | 0.630 |
| <i>BTN3A3</i>     | -0.1670 | 0.629 |
| <i>EHD3</i>       | -0.1670 | 0.629 |
| <i>LRRC40</i>     | -0.1672 | 0.629 |
| <i>AC009831.1</i> | -0.1673 | 0.629 |
| <i>S1PR2</i>      | -0.1674 | 0.629 |
| <i>TMEM42</i>     | -0.1675 | 0.629 |
| <i>POP4</i>       | -0.1676 | 0.628 |
| <i>ECD</i>        | -0.1676 | 0.628 |
| <i>AC004865.2</i> | -0.1679 | 0.628 |
| <i>AC021097.1</i> | -0.1679 | 0.628 |
| <i>CRTAM</i>      | -0.1681 | 0.627 |
| <i>PNPT1</i>      | -0.1682 | 0.627 |

|                   |         |       |
|-------------------|---------|-------|
| <i>C18orf8</i>    | -0.1684 | 0.627 |
| <i>TBL2</i>       | -0.1684 | 0.627 |
| <i>FZR1</i>       | -0.1685 | 0.627 |
| <i>GALNS</i>      | -0.1686 | 0.627 |
| <i>FEM1B</i>      | -0.1686 | 0.627 |
| <i>ZNF701</i>     | -0.1687 | 0.626 |
| <i>EAPP</i>       | -0.1687 | 0.626 |
| <i>TMEM170B</i>   | -0.1688 | 0.626 |
| <i>GGCX</i>       | -0.1689 | 0.626 |
| <i>VIL1</i>       | -0.1690 | 0.626 |
| <i>HTATSF1</i>    | -0.1692 | 0.626 |
| <i>OCIAD2</i>     | -0.1693 | 0.625 |
| <i>CARF</i>       | -0.1697 | 0.625 |
| <i>HMBOX1</i>     | -0.1700 | 0.624 |
| <i>ESF1</i>       | -0.1701 | 0.624 |
| <i>TPT1-AS1</i>   | -0.1701 | 0.624 |
| <i>COQ4</i>       | -0.1702 | 0.624 |
| <i>NUP37</i>      | -0.1703 | 0.624 |
| <i>ENDOG</i>      | -0.1704 | 0.624 |
| <i>CDK5R1</i>     | -0.1704 | 0.623 |
| <i>ZNF81</i>      | -0.1713 | 0.622 |
| <i>TSPAN31</i>    | -0.1714 | 0.622 |
| <i>MCCC1</i>      | -0.1715 | 0.622 |
| <i>EEF1E1</i>     | -0.1718 | 0.621 |
| <i>LINC00998</i>  | -0.1719 | 0.621 |
| <i>OXR1</i>       | -0.1719 | 0.621 |
| <i>ZNF398</i>     | -0.1720 | 0.621 |
| <i>LY96</i>       | -0.1721 | 0.621 |
| <i>ZNF331</i>     | -0.1723 | 0.620 |
| <i>FBF1</i>       | -0.1723 | 0.620 |
| <i>CAB39</i>      | -0.1723 | 0.620 |
| <i>CYBRD1</i>     | -0.1726 | 0.620 |
| <i>MFSD11</i>     | -0.1726 | 0.620 |
| <i>IQSEC2</i>     | -0.1727 | 0.620 |
| <i>CLIP4</i>      | -0.1727 | 0.619 |
| <i>ATP7A</i>      | -0.1728 | 0.619 |
| <i>AC090409.1</i> | -0.1728 | 0.619 |
| <i>DNPH1</i>      | -0.1728 | 0.619 |
| <i>BEST1</i>      | -0.1728 | 0.619 |
| <i>MED24</i>      | -0.1729 | 0.619 |
| <i>KIF22</i>      | -0.1729 | 0.619 |
| <i>NUP107</i>     | -0.1730 | 0.619 |
| <i>IKZF5</i>      | -0.1731 | 0.619 |
| <i>RCHY1</i>      | -0.1733 | 0.619 |
| <i>AC010186.3</i> | -0.1733 | 0.618 |
| <i>RAD1</i>       | -0.1734 | 0.618 |
| <i>ZNF320</i>     | -0.1734 | 0.618 |
| <i>RUNDC3A</i>    | -0.1735 | 0.618 |



|                   |         |       |
|-------------------|---------|-------|
| <i>NME3</i>       | -0.1737 | 0.618 |
| <i>CCDC117</i>    | -0.1739 | 0.618 |
| <i>C1orf122</i>   | -0.1739 | 0.617 |
| <i>MAGED1</i>     | -0.1740 | 0.617 |
| <i>MAGI2-AS3</i>  | -0.1740 | 0.617 |
| <i>PIP5K1A</i>    | -0.1740 | 0.617 |
| <i>PTPRN2</i>     | -0.1741 | 0.617 |
| <i>AC009948.5</i> | -0.1742 | 0.617 |
| <i>NAXD</i>       | -0.1743 | 0.617 |
| <i>CHCHD5</i>     | -0.1746 | 0.616 |
| <i>MTND2P28</i>   | -0.1749 | 0.616 |
| <i>F8A1</i>       | -0.1750 | 0.616 |
| <i>SUCO</i>       | -0.1751 | 0.615 |
| <i>POFUT1</i>     | -0.1752 | 0.615 |
| <i>PIK3R4</i>     | -0.1753 | 0.615 |
| <i>TMEM205</i>    | -0.1754 | 0.615 |
| <i>ZHX3</i>       | -0.1755 | 0.615 |
| <i>REV1</i>       | -0.1757 | 0.614 |
| <i>SWAP70</i>     | -0.1760 | 0.614 |
| <i>TNFRSF13B</i>  | -0.1760 | 0.614 |
| <i>MRPL50</i>     | -0.1760 | 0.614 |
| <i>PET100</i>     | -0.1762 | 0.614 |
| <i>EFHC1</i>      | -0.1764 | 0.613 |
| <i>SCARNA21</i>   | -0.1764 | 0.613 |
| <i>AC040977.1</i> | -0.1765 | 0.613 |
| <i>ICE1</i>       | -0.1765 | 0.613 |
| <i>KIAA0513</i>   | -0.1765 | 0.613 |
| <i>PDHB</i>       | -0.1768 | 0.613 |
| <i>SPEF2</i>      | -0.1768 | 0.613 |
| <i>CYFIP1</i>     | -0.1770 | 0.612 |
| <i>STX6</i>       | -0.1771 | 0.612 |
| <i>FOS</i>        | -0.1772 | 0.612 |
| <i>MRPL48</i>     | -0.1772 | 0.612 |
| <i>CUL5</i>       | -0.1772 | 0.612 |
| <i>UQCC3</i>      | -0.1773 | 0.612 |
| <i>MTMR2</i>      | -0.1775 | 0.611 |
| <i>ARRDC1-AS1</i> | -0.1775 | 0.611 |
| <i>ZBTB38</i>     | -0.1776 | 0.611 |
| <i>RANBP6</i>     | -0.1776 | 0.611 |
| <i>SNX2</i>       | -0.1777 | 0.611 |
| <i>ZWILCH</i>     | -0.1777 | 0.611 |
| <i>SSTR2</i>      | -0.1778 | 0.611 |
| <i>STK35</i>      | -0.1781 | 0.610 |
| <i>ZNF506</i>     | -0.1781 | 0.610 |
| <i>FBXO21</i>     | -0.1782 | 0.610 |
| <i>WRN</i>        | -0.1783 | 0.610 |
| <i>COL9A2</i>     | -0.1785 | 0.610 |
| <i>RCL1</i>       | -0.1785 | 0.610 |

|                  |         |       |
|------------------|---------|-------|
| <i>COPS7B</i>    | -0.1786 | 0.609 |
| <i>AMT</i>       | -0.1791 | 0.609 |
| <i>YTHDC2</i>    | -0.1792 | 0.609 |
| <i>SUDS3</i>     | -0.1792 | 0.608 |
| <i>PSMC1</i>     | -0.1795 | 0.608 |
| <i>LRRC37A4P</i> | -0.1796 | 0.608 |
| <i>PARP15</i>    | -0.1796 | 0.608 |
| <i>NPEPL1</i>    | -0.1797 | 0.608 |
| <i>FGFBP3</i>    | -0.1797 | 0.608 |
| <i>VAMP4</i>     | -0.1797 | 0.608 |
| <i>NUP88</i>     | -0.1797 | 0.608 |
| <i>UROD</i>      | -0.1799 | 0.607 |
| <i>AMN1</i>      | -0.1803 | 0.607 |
| <i>UACA</i>      | -0.1803 | 0.607 |
| <i>PRKCSH</i>    | -0.1804 | 0.606 |
| <i>LZTR1</i>     | -0.1808 | 0.606 |
| <i>GUF1</i>      | -0.1812 | 0.605 |
| <i>FBRSL1</i>    | -0.1813 | 0.605 |
| <i>ZNF530</i>    | -0.1814 | 0.605 |
| <i>R3HCC1L</i>   | -0.1814 | 0.605 |
| <i>FBXO34</i>    | -0.1814 | 0.605 |
| <i>ZNF830</i>    | -0.1814 | 0.605 |
| <i>SLC43A3</i>   | -0.1816 | 0.604 |
| <i>HIVEP3</i>    | -0.1819 | 0.604 |
| <i>LDLR</i>      | -0.1819 | 0.604 |
| <i>STAU2</i>     | -0.1820 | 0.604 |
| <i>CSTF2T</i>    | -0.1820 | 0.604 |
| <i>SNORD104</i>  | -0.1823 | 0.603 |
| <i>DDX39B</i>    | -0.1824 | 0.603 |
| <i>UCK1</i>      | -0.1825 | 0.603 |
| <i>FAM133B</i>   | -0.1825 | 0.603 |
| <i>C9orf85</i>   | -0.1826 | 0.603 |
| <i>APBB3</i>     | -0.1827 | 0.603 |
| <i>UBE2D1</i>    | -0.1827 | 0.603 |
| <i>RAB4B</i>     | -0.1832 | 0.602 |
| <i>CEP97</i>     | -0.1832 | 0.602 |
| <i>APOOL</i>     | -0.1835 | 0.601 |
| <i>STK32C</i>    | -0.1836 | 0.601 |
| <i>ALDH1A1</i>   | -0.1840 | 0.600 |
| <i>PIK3C3</i>    | -0.1841 | 0.600 |
| <i>CRYBG3</i>    | -0.1841 | 0.600 |
| <i>SOCS2</i>     | -0.1844 | 0.600 |
| <i>NDC1</i>      | -0.1846 | 0.599 |
| <i>MRPL1</i>     | -0.1847 | 0.599 |
| <i>TMEM176B</i>  | -0.1848 | 0.599 |
| <i>ATG10</i>     | -0.1850 | 0.599 |
| <i>SPRYD4</i>    | -0.1851 | 0.599 |
| <i>EDEM1</i>     | -0.1851 | 0.599 |

|                        |         |       |
|------------------------|---------|-------|
| <i>TNFRSF25</i>        | -0.1851 | 0.599 |
| <i>GDPD3</i>           | -0.1853 | 0.598 |
| <i>SH3GL1</i>          | -0.1856 | 0.598 |
| <i>AKIRIN2</i>         | -0.1857 | 0.598 |
| <i>SLC35A1</i>         | -0.1857 | 0.598 |
| <i>PARG</i>            | -0.1859 | 0.597 |
| <i>CTSC</i>            | -0.1862 | 0.597 |
| <i>OTUD4</i>           | -0.1862 | 0.597 |
| <i>NT5E</i>            | -0.1865 | 0.596 |
| <i>LEMD2</i>           | -0.1866 | 0.596 |
| <i>ODF2L</i>           | -0.1866 | 0.596 |
| <i>RAB18</i>           | -0.1867 | 0.596 |
| <i>AL118506.1</i>      | -0.1868 | 0.596 |
| <i>LARP4</i>           | -0.1870 | 0.595 |
| <i>AC010335.3</i>      | -0.1871 | 0.595 |
| <i>PDE4A</i>           | -0.1872 | 0.595 |
| <i>THOC5</i>           | -0.1874 | 0.595 |
| <i>ANKMY1</i>          | -0.1877 | 0.594 |
| <i>PDCD2</i>           | -0.1877 | 0.594 |
| <i>SMARCAD1</i>        | -0.1878 | 0.594 |
| <i>DGKG</i>            | -0.1879 | 0.594 |
| <i>CR1</i>             | -0.1883 | 0.593 |
| <i>PLEKHA5</i>         | -0.1883 | 0.593 |
| <i>SNRNP35</i>         | -0.1884 | 0.593 |
| <i>TMEM214</i>         | -0.1885 | 0.593 |
| <i>KIAA1841</i>        | -0.1886 | 0.593 |
| <i>ERLIN1</i>          | -0.1886 | 0.593 |
| <i>STARD9</i>          | -0.1890 | 0.592 |
| <i>TAB3</i>            | -0.1892 | 0.592 |
| <i>FAM193B</i>         | -0.1892 | 0.592 |
| <i>TSTA3</i>           | -0.1895 | 0.591 |
| <i>CEP44</i>           | -0.1897 | 0.591 |
| <i>ZNF195</i>          | -0.1897 | 0.591 |
| <i>ENSG00000281350</i> | -0.1900 | 0.591 |
| <i>TMEM230</i>         | -0.1900 | 0.590 |
| <i>IFRD2</i>           | -0.1901 | 0.590 |
| <i>THAP1</i>           | -0.1901 | 0.590 |
| <i>MRPL36</i>          | -0.1902 | 0.590 |
| <i>RDH14</i>           | -0.1902 | 0.590 |
| <i>BCDIN3D</i>         | -0.1903 | 0.590 |
| <i>RNF113A</i>         | -0.1910 | 0.589 |
| <i>TRAPPC10</i>        | -0.1911 | 0.589 |
| <i>DSE</i>             | -0.1912 | 0.589 |
| <i>ZC3H10</i>          | -0.1916 | 0.588 |
| <i>NFKB2</i>           | -0.1917 | 0.588 |
| <i>ASCC3</i>           | -0.1921 | 0.587 |
| <i>AC023090.2</i>      | -0.1923 | 0.587 |
| <i>TSIX</i>            | -0.1926 | 0.586 |

|            |         |       |
|------------|---------|-------|
| TANK       | -0.1936 | 0.585 |
| CNOT6      | -0.1938 | 0.584 |
| SMG6       | -0.1938 | 0.584 |
| PLRG1      | -0.1942 | 0.584 |
| AC135983.2 | -0.1942 | 0.584 |
| LPAR5      | -0.1947 | 0.583 |
| NHLRC3     | -0.1947 | 0.583 |
| MIS18BP1   | -0.1947 | 0.583 |
| HPF1       | -0.1950 | 0.582 |
| AC126474.2 | -0.1953 | 0.582 |
| MCU        | -0.1956 | 0.581 |
| PRDX4      | -0.1958 | 0.581 |
| RBM22      | -0.1959 | 0.581 |
| MIOS       | -0.1959 | 0.581 |
| DNAJC16    | -0.1960 | 0.581 |
| INTS3      | -0.1960 | 0.581 |
| ACBD4      | -0.1961 | 0.581 |
| CRELD1     | -0.1962 | 0.580 |
| SAC3D1     | -0.1963 | 0.580 |
| AC090498.1 | -0.1965 | 0.580 |
| SIRT1      | -0.1966 | 0.580 |
| AC027279.1 | -0.1968 | 0.579 |
| SOCS3      | -0.1972 | 0.579 |
| MPI        | -0.1973 | 0.579 |
| KBTBD11    | -0.1973 | 0.579 |
| TATDN1     | -0.1973 | 0.579 |
| DCUN1D4    | -0.1974 | 0.578 |
| ZYG11B     | -0.1975 | 0.578 |
| DOPEY2     | -0.1976 | 0.578 |
| TP53BP1    | -0.1976 | 0.578 |
| SLC7A6OS   | -0.1976 | 0.578 |
| CHSY1      | -0.1979 | 0.578 |
| GEMIN4     | -0.1982 | 0.577 |
| KLF12      | -0.1983 | 0.577 |
| GOLPH3L    | -0.1984 | 0.577 |
| ACSL5      | -0.1985 | 0.577 |
| CEBPG      | -0.1985 | 0.577 |
| IFT27      | -0.1986 | 0.577 |
| MIR4458HG  | -0.1988 | 0.576 |
| RPP38      | -0.1989 | 0.576 |
| RN7SL329P  | -0.1990 | 0.576 |
| LRRK1      | -0.1991 | 0.576 |
| ATP13A1    | -0.1991 | 0.576 |
| ANAPC7     | -0.1991 | 0.576 |
| MALT1      | -0.1991 | 0.576 |
| EPS15      | -0.1992 | 0.576 |
| CWC22      | -0.1995 | 0.575 |
| CCDC91     | -0.1998 | 0.575 |

|                   |         |       |
|-------------------|---------|-------|
| <i>TFDP2</i>      | -0.2002 | 0.574 |
| <i>CBR1</i>       | -0.2002 | 0.574 |
| <i>R3HCC1</i>     | -0.2004 | 0.574 |
| <i>TRAF3IP1</i>   | -0.2004 | 0.574 |
| <i>AC133552.2</i> | -0.2005 | 0.574 |
| <i>FANCM</i>      | -0.2010 | 0.573 |
| <i>C9orf16</i>    | -0.2011 | 0.573 |
| <i>ZBTB24</i>     | -0.2013 | 0.572 |
| <i>HYI</i>        | -0.2013 | 0.572 |
| <i>AP000936.3</i> | -0.2014 | 0.572 |
| <i>LILRA6</i>     | -0.2016 | 0.572 |
| <i>RAPGEF6</i>    | -0.2016 | 0.572 |
| <i>GALK2</i>      | -0.2016 | 0.572 |
| <i>TIMM17B</i>    | -0.2020 | 0.571 |
| <i>ZNF283</i>     | -0.2023 | 0.571 |
| <i>MTAP</i>       | -0.2024 | 0.570 |
| <i>ZADH2</i>      | -0.2025 | 0.570 |
| <i>PAPSS1</i>     | -0.2029 | 0.570 |
| <i>AC012146.1</i> | -0.2029 | 0.570 |
| <i>ZNF587B</i>    | -0.2029 | 0.570 |
| <i>MARCO</i>      | -0.2032 | 0.569 |
| <i>HIST1H1D</i>   | -0.2032 | 0.569 |
| <i>LINC01451</i>  | -0.2036 | 0.569 |
| <i>FCRLA</i>      | -0.2037 | 0.569 |
| <i>MYB</i>        | -0.2039 | 0.568 |
| <i>GTPBP3</i>     | -0.2043 | 0.567 |
| <i>ZNF354A</i>    | -0.2044 | 0.567 |
| <i>ZNF284</i>     | -0.2046 | 0.567 |
| <i>FBXO42</i>     | -0.2046 | 0.567 |
| <i>GEN1</i>       | -0.2049 | 0.567 |
| <i>CDC40</i>      | -0.2049 | 0.567 |
| <i>CACNA2D2</i>   | -0.2049 | 0.567 |
| <i>NEK8</i>       | -0.2051 | 0.566 |
| <i>DNM1L</i>      | -0.2053 | 0.566 |
| <i>BISPR</i>      | -0.2054 | 0.566 |
| <i>DHX34</i>      | -0.2054 | 0.566 |
| <i>DDX59</i>      | -0.2057 | 0.565 |
| <i>RN7SL172P</i>  | -0.2063 | 0.564 |
| <i>GTF2H2C</i>    | -0.2067 | 0.564 |
| <i>KAT8</i>       | -0.2070 | 0.563 |
| <i>ZFP14</i>      | -0.2071 | 0.563 |
| <i>RBM27</i>      | -0.2072 | 0.563 |
| <i>ASAP1-IT2</i>  | -0.2074 | 0.563 |
| <i>CMC1</i>       | -0.2074 | 0.563 |
| <i>ZNF623</i>     | -0.2074 | 0.563 |
| <i>C1D</i>        | -0.2074 | 0.563 |
| <i>GKAP1</i>      | -0.2077 | 0.562 |
| <i>TMEM156</i>    | -0.2077 | 0.562 |

|                   |         |       |
|-------------------|---------|-------|
| <i>DHRS4-AS1</i>  | -0.2080 | 0.562 |
| <i>MRPS27</i>     | -0.2081 | 0.562 |
| <i>SURF2</i>      | -0.2082 | 0.561 |
| <i>ZNF880</i>     | -0.2083 | 0.561 |
| <i>RNF144B</i>    | -0.2083 | 0.561 |
| <i>OSTC</i>       | -0.2083 | 0.561 |
| <i>SNHG19</i>     | -0.2084 | 0.561 |
| <i>HPGD</i>       | -0.2084 | 0.561 |
| <i>ZNF266</i>     | -0.2084 | 0.561 |
| <i>THAP9-AS1</i>  | -0.2085 | 0.561 |
| <i>AC093323.1</i> | -0.2086 | 0.561 |
| <i>KLHDC8B</i>    | -0.2086 | 0.561 |
| <i>LTBP1</i>      | -0.2087 | 0.561 |
| <i>MFN1</i>       | -0.2093 | 0.560 |
| <i>AC003102.1</i> | -0.2094 | 0.560 |
| <i>TXLNG</i>      | -0.2095 | 0.559 |
| <i>NKAP</i>       | -0.2103 | 0.558 |
| <i>FAM8A1</i>     | -0.2108 | 0.557 |
| <i>TPMT</i>       | -0.2110 | 0.557 |
| <i>FRA10AC1</i>   | -0.2112 | 0.557 |
| <i>GTPBP8</i>     | -0.2112 | 0.557 |
| <i>PCCB</i>       | -0.2115 | 0.556 |
| <i>QRICH1</i>     | -0.2120 | 0.556 |
| <i>C1GALT1</i>    | -0.2120 | 0.556 |
| <i>PPP1R35</i>    | -0.2120 | 0.556 |
| <i>THG1L</i>      | -0.2123 | 0.555 |
| <i>XPO4</i>       | -0.2126 | 0.555 |
| <i>BICDL1</i>     | -0.2129 | 0.554 |
| <i>ITPRIPL1</i>   | -0.2131 | 0.554 |
| <i>PYROXD2</i>    | -0.2134 | 0.553 |
| <i>KPNA2</i>      | -0.2135 | 0.553 |
| <i>MRS2</i>       | -0.2137 | 0.553 |
| <i>GEMIN8</i>     | -0.2140 | 0.553 |
| <i>KMO</i>        | -0.2145 | 0.552 |
| <i>SRRD</i>       | -0.2149 | 0.551 |
| <i>JAGN1</i>      | -0.2150 | 0.551 |
| <i>CCDC112</i>    | -0.2151 | 0.551 |
| <i>ACAT1</i>      | -0.2157 | 0.550 |
| <i>NDUFA6</i>     | -0.2159 | 0.550 |
| <i>SHTN1</i>      | -0.2159 | 0.550 |
| <i>HIST1H2AE</i>  | -0.2160 | 0.549 |
| <i>USE1</i>       | -0.2160 | 0.549 |
| <i>NSUN5P2</i>    | -0.2164 | 0.549 |
| <i>DCK</i>        | -0.2168 | 0.548 |
| <i>GATA3</i>      | -0.2169 | 0.548 |
| <i>MRPS12</i>     | -0.2171 | 0.548 |
| <i>AAGAB</i>      | -0.2171 | 0.548 |
| <i>RAB30</i>      | -0.2173 | 0.547 |

|                   |         |       |
|-------------------|---------|-------|
| <i>DTNBP1</i>     | -0.2175 | 0.547 |
| <i>DDX55</i>      | -0.2176 | 0.547 |
| <i>TRNAU1AP</i>   | -0.2182 | 0.546 |
| <i>HOPX</i>       | -0.2185 | 0.546 |
| <i>SLC39A3</i>    | -0.2186 | 0.545 |
| <i>ZBED6CL</i>    | -0.2186 | 0.545 |
| <i>VGLL4</i>      | -0.2187 | 0.545 |
| <i>ZNF337</i>     | -0.2190 | 0.545 |
| <i>ZNF672</i>     | -0.2190 | 0.545 |
| <i>LAX1</i>       | -0.2193 | 0.544 |
| <i>TMEM260</i>    | -0.2194 | 0.544 |
| <i>MT-TR</i>      | -0.2196 | 0.544 |
| <i>SPTAN1</i>     | -0.2198 | 0.544 |
| <i>IPO13</i>      | -0.2199 | 0.544 |
| <i>CCDC175</i>    | -0.2200 | 0.543 |
| <i>ZNF107</i>     | -0.2202 | 0.543 |
| <i>OTUD3</i>      | -0.2203 | 0.543 |
| <i>HEATR5B</i>    | -0.2203 | 0.543 |
| <i>HNRNPLL</i>    | -0.2205 | 0.543 |
| <i>ZNF321P</i>    | -0.2207 | 0.542 |
| <i>RCBTB1</i>     | -0.2208 | 0.542 |
| <i>SRGAP2C</i>    | -0.2215 | 0.541 |
| <i>OXCT1</i>      | -0.2217 | 0.541 |
| <i>CRY1</i>       | -0.2222 | 0.540 |
| <i>COL18A1</i>    | -0.2222 | 0.540 |
| <i>RPS20P10</i>   | -0.2229 | 0.539 |
| <i>CHCHD4</i>     | -0.2230 | 0.539 |
| <i>PYGO2</i>      | -0.2233 | 0.538 |
| <i>ERMARD</i>     | -0.2238 | 0.538 |
| <i>C14orf119</i>  | -0.2240 | 0.537 |
| <i>AP003068.2</i> | -0.2244 | 0.537 |
| <i>CEACAM4</i>    | -0.2250 | 0.536 |
| <i>PDP2</i>       | -0.2260 | 0.534 |
| <i>RBM15</i>      | -0.2261 | 0.534 |
| <i>KAT14</i>      | -0.2267 | 0.533 |
| <i>ZNF776</i>     | -0.2268 | 0.533 |
| <i>HDHD5</i>      | -0.2273 | 0.532 |
| <i>AP1G2</i>      | -0.2274 | 0.532 |
| <i>EXOSC7</i>     | -0.2275 | 0.532 |
| <i>CSPP1</i>      | -0.2279 | 0.532 |
| <i>ENKUR</i>      | -0.2280 | 0.531 |
| <i>AC243964.3</i> | -0.2280 | 0.531 |
| <i>DNASE1</i>     | -0.2289 | 0.530 |
| <i>ALG2</i>       | -0.2289 | 0.530 |
| <i>ATF2</i>       | -0.2290 | 0.530 |
| <i>PRKCQ</i>      | -0.2294 | 0.529 |
| <i>MTX3</i>       | -0.2294 | 0.529 |
| <i>KLHL2</i>      | -0.2302 | 0.528 |

|                   |         |       |
|-------------------|---------|-------|
| <i>FANCL</i>      | -0.2303 | 0.528 |
| <i>KIF13B</i>     | -0.2307 | 0.527 |
| <i>CYB5B</i>      | -0.2312 | 0.527 |
| <i>ZMPSTE24</i>   | -0.2316 | 0.526 |
| <i>YPEL1</i>      | -0.2324 | 0.525 |
| <i>TK2</i>        | -0.2327 | 0.525 |
| <i>AC133065.6</i> | -0.2331 | 0.524 |
| <i>DENND6A</i>    | -0.2333 | 0.524 |
| <i>METTL15</i>    | -0.2339 | 0.523 |
| <i>PACS2</i>      | -0.2347 | 0.522 |
| <i>TBC1D12</i>    | -0.2351 | 0.521 |
| <i>MYO6</i>       | -0.2354 | 0.521 |
| <i>AC131212.2</i> | -0.2366 | 0.519 |
| <i>PDE4DIP</i>    | -0.2368 | 0.519 |
| <i>PEF1</i>       | -0.2370 | 0.518 |
| <i>DLG4</i>       | -0.2372 | 0.518 |
| <i>WDR73</i>      | -0.2372 | 0.518 |
| <i>NQO2</i>       | -0.2376 | 0.518 |
| <i>AC109454.2</i> | -0.2377 | 0.517 |
| <i>DISC1</i>      | -0.2388 | 0.516 |
| <i>PP7080</i>     | -0.2390 | 0.516 |
| <i>NOC3L</i>      | -0.2398 | 0.514 |
| <i>LRRC28</i>     | -0.2403 | 0.514 |
| <i>SNORD13E</i>   | -0.2404 | 0.514 |
| <i>ABCG1</i>      | -0.2408 | 0.513 |
| <i>MRPS31</i>     | -0.2409 | 0.513 |
| <i>DHRS9</i>      | -0.2409 | 0.513 |
| <i>TPD52</i>      | -0.2410 | 0.513 |
| <i>PROSER1</i>    | -0.2414 | 0.512 |
| <i>KTI12</i>      | -0.2417 | 0.512 |
| <i>MAPKAPK5</i>   | -0.2421 | 0.511 |
| <i>BRAF</i>       | -0.2423 | 0.511 |
| <i>QSOX2</i>      | -0.2424 | 0.511 |
| <i>KIF1B</i>      | -0.2424 | 0.511 |
| <i>ERF</i>        | -0.2431 | 0.510 |
| <i>PLXND1</i>     | -0.2431 | 0.510 |
| <i>MON2</i>       | -0.2432 | 0.510 |
| <i>AL365475.1</i> | -0.2432 | 0.509 |
| <i>COX18</i>      | -0.2434 | 0.509 |
| <i>RPSAP21</i>    | -0.2438 | 0.509 |
| <i>SLC11A2</i>    | -0.2439 | 0.508 |
| <i>CRACR2A</i>    | -0.2442 | 0.508 |
| <i>SMIM20</i>     | -0.2443 | 0.508 |
| <i>BCL2L12</i>    | -0.2450 | 0.507 |
| <i>WLS</i>        | -0.2453 | 0.506 |
| <i>EID2</i>       | -0.2456 | 0.506 |
| <i>NSMCE2</i>     | -0.2462 | 0.505 |
| <i>ELMOD3</i>     | -0.2463 | 0.505 |



|                   |         |       |
|-------------------|---------|-------|
| <i>PPA1</i>       | -0.2463 | 0.505 |
| <i>CD300C</i>     | -0.2464 | 0.505 |
| <i>TUBD1</i>      | -0.2464 | 0.505 |
| <i>AL356273.3</i> | -0.2464 | 0.505 |
| <i>PLA2G15</i>    | -0.2466 | 0.505 |
| <i>MAP2K1</i>     | -0.2469 | 0.504 |
| <i>DNTTIP2</i>    | -0.2476 | 0.503 |
| <i>PDE4B</i>      | -0.2478 | 0.503 |
| <i>CISD1</i>      | -0.2482 | 0.502 |
| <i>WASHC2C</i>    | -0.2489 | 0.501 |
| <i>PFKFB2</i>     | -0.2489 | 0.501 |
| <i>PI4KB</i>      | -0.2490 | 0.501 |
| <i>COPS5</i>      | -0.2503 | 0.500 |
| <i>PIP4K2B</i>    | -0.2503 | 0.500 |
| <i>FAM168B</i>    | -0.2517 | 0.498 |
| <i>AP000347.1</i> | -0.2522 | 0.497 |
| <i>CRIP2</i>      | -0.2525 | 0.496 |
| <i>LINC01550</i>  | -0.2527 | 0.496 |
| <i>NEK6</i>       | -0.2529 | 0.496 |
| <i>NTPCR</i>      | -0.2529 | 0.496 |
| <i>STXBP3</i>     | -0.2530 | 0.496 |
| <i>METTL5</i>     | -0.2539 | 0.495 |
| <i>HACD4</i>      | -0.2547 | 0.494 |
| <i>RPH3A</i>      | -0.2552 | 0.493 |
| <i>SEC24B</i>     | -0.2555 | 0.492 |
| <i>RANBP3</i>     | -0.2575 | 0.490 |
| <i>MAGEF1</i>     | -0.2577 | 0.489 |
| <i>DPP9</i>       | -0.2580 | 0.489 |
| <i>TELO2</i>      | -0.2584 | 0.488 |
| <i>JOSD1</i>      | -0.2588 | 0.488 |
| <i>RARS</i>       | -0.2592 | 0.487 |
| <i>AC012358.3</i> | -0.2593 | 0.487 |
| <i>PYROXD1</i>    | -0.2599 | 0.486 |
| <i>ERCC3</i>      | -0.2623 | 0.483 |
| <i>LILRB4</i>     | -0.2626 | 0.483 |
| <i>CASS4</i>      | -0.2643 | 0.481 |
| <i>LYRM4</i>      | -0.2651 | 0.480 |
| <i>SELENOH</i>    | -0.2665 | 0.478 |
| <i>DCAKD</i>      | -0.2682 | 0.475 |
| <i>RANBP2</i>     | -0.2688 | 0.475 |
| <i>DIP2B</i>      | -0.2698 | 0.473 |
| <i>USP38</i>      | -0.2706 | 0.472 |
| <i>SERINC2</i>    | -0.2710 | 0.472 |
| <i>IRGQ</i>       | -0.2725 | 0.470 |
| <i>SYVN1</i>      | -0.2731 | 0.469 |
| <i>TPRN</i>       | -0.2733 | 0.469 |
| <i>SPATA5</i>     | -0.2734 | 0.469 |
| <i>BARD1</i>      | -0.2737 | 0.468 |

|                   |         |       |
|-------------------|---------|-------|
| <i>TTN-AS1</i>    | -0.2744 | 0.467 |
| <i>ZBTB34</i>     | -0.2758 | 0.466 |
| <i>TARSL2</i>     | -0.2764 | 0.465 |
| <i>TXK</i>        | -0.2784 | 0.462 |
| <i>OSER1</i>      | -0.2785 | 0.462 |
| <i>TLL5</i>       | -0.2788 | 0.462 |
| <i>AC024075.1</i> | -0.2794 | 0.461 |
| <i>FEZ2</i>       | -0.2806 | 0.459 |
| <i>NIPA2</i>      | -0.2818 | 0.458 |
| <i>TNFRSF10D</i>  | -0.2826 | 0.457 |
| <i>MRPS18A</i>    | -0.2840 | 0.455 |
| <i>DGAT2</i>      | -0.2844 | 0.455 |
| <i>ZNF644</i>     | -0.2848 | 0.454 |
| <i>AC010642.2</i> | -0.2856 | 0.453 |
| <i>AMZ2P1</i>     | -0.2858 | 0.453 |
| <i>FOXRED1</i>    | -0.2902 | 0.447 |
| <i>RPP14</i>      | -0.2916 | 0.445 |
| <i>HSDL2</i>      | -0.2924 | 0.445 |
| <i>MPC1</i>       | -0.2976 | 0.438 |
| <i>UBE2Q2</i>     | -0.2980 | 0.438 |
| <i>PAFAH2</i>     | -0.3018 | 0.433 |
| <i>HNRNPA3P6</i>  | -0.3021 | 0.433 |
| <i>TIMM10B</i>    | -0.3040 | 0.430 |
| <i>TNKS2</i>      | -0.3062 | 0.428 |
| <i>EXD3</i>       | -0.3086 | 0.425 |
| <i>AC018755.4</i> | -0.3088 | 0.425 |
| <i>CHCHD1</i>     | -0.3095 | 0.424 |
| <i>GLT8D1</i>     | -0.3115 | 0.422 |
| <i>LRFN4</i>      | -0.3117 | 0.421 |
| <i>EIF2D</i>      | -0.3130 | 0.420 |
| <i>TNFAIP1</i>    | -0.3133 | 0.420 |
| <i>TMEM176A</i>   | -0.3142 | 0.418 |
| <i>TCF12</i>      | -0.3143 | 0.418 |
| <i>STK26</i>      | -0.3174 | 0.415 |
| <i>MBD1</i>       | -0.3180 | 0.414 |
| <i>GPR108</i>     | -0.3255 | 0.406 |
| <i>SLC50A1</i>    | -0.3267 | 0.404 |
| <i>CLYBL</i>      | -0.3278 | 0.403 |
| <i>PHF1</i>       | -0.3287 | 0.402 |
| <i>TMEM208</i>    | -0.3361 | 0.394 |
| <i>HSPBAP1</i>    | -0.3402 | 0.389 |
| <i>NIF3L1</i>     | -0.3542 | 0.375 |
| <i>CCZ1</i>       | -0.3555 | 0.373 |
| <i>LRFN1</i>      | -0.3564 | 0.372 |
| <i>GMPS</i>       | -0.3617 | 0.367 |
| <i>ACAD8</i>      | -0.3662 | 0.362 |
| <i>NCAPG2</i>     | -0.3781 | 0.351 |
| <i>RAB11B-AS1</i> | -0.4129 | 0.318 |
