# Supplementary material
Source: PubMed Central journal article supplement (PMC8447850)
Supplement: NIHMS1717311-supplement-supplemental_table_1c.pdf [file NIHMS1717311-supplement-supplemental_table_1c.pdf]

**Table 1c.**

| Gene                                                   | log2 RNA/z | Fold-difference / 4z |
|--------------------------------------------------------|------------|----------------------|
| <b>Upregulated in association with PerceivedStress</b> |            |                      |
| <i>ACPP</i>                                            | 0.3513     | 2.65                 |
| <i>FRMD4A</i>                                          | 0.3474     | 2.62                 |
| <i>RAD51-AS1</i>                                       | 0.3455     | 2.61                 |
| <i>KATNBL1</i>                                         | 0.3353     | 2.53                 |
| <i>AL109741.1</i>                                      | 0.3183     | 2.42                 |
| <i>AL662795.2</i>                                      | 0.3058     | 2.33                 |
| <i>MCPH1</i>                                           | 0.2992     | 2.29                 |
| <i>MCM4</i>                                            | 0.2979     | 2.28                 |
| <i>RTP4</i>                                            | 0.2968     | 2.28                 |
| <i>PIGQ</i>                                            | 0.2956     | 2.27                 |
| <i>COMMD8</i>                                          | 0.2908     | 2.24                 |
| <i>Z69706.1</i>                                        | 0.2903     | 2.24                 |
| <i>AKT3</i>                                            | 0.2887     | 2.23                 |
| <i>AC026979.3</i>                                      | 0.2870     | 2.22                 |
| <i>AC006001.3</i>                                      | 0.2781     | 2.16                 |
| <i>HAUS6</i>                                           | 0.2777     | 2.16                 |
| <i>TDRD3</i>                                           | 0.2709     | 2.12                 |
| <i>MAN1A1</i>                                          | 0.2696     | 2.11                 |
| <i>MAML1</i>                                           | 0.2687     | 2.11                 |
| <i>FDXR</i>                                            | 0.2686     | 2.11                 |
| <i>AC139887.2</i>                                      | 0.2649     | 2.08                 |
| <i>RNF123</i>                                          | 0.2606     | 2.06                 |
| <i>CAMKK1</i>                                          | 0.2584     | 2.05                 |
| <i>ZNF84</i>                                           | 0.2562     | 2.03                 |
| <i>MRPS26</i>                                          | 0.2539     | 2.02                 |
| <i>TM2D2</i>                                           | 0.2518     | 2.01                 |
| <i>PELO</i>                                            | 0.2514     | 2.01                 |
| <i>SASH1</i>                                           | 0.2512     | 2.01                 |
| <i>RAP1GAP</i>                                         | 0.2511     | 2.01                 |
| <i>BCL7A</i>                                           | 0.2505     | 2.00                 |
| <i>FAM228B</i>                                         | 0.2500     | 2.00                 |
| <i>HIST1H3H</i>                                        | 0.2495     | 2.00                 |
| <i>AC067852.2</i>                                      | 0.2488     | 1.99                 |
| <i>ZNF280D</i>                                         | 0.2477     | 1.99                 |
| <i>ANK1</i>                                            | 0.2464     | 1.98                 |
| <i>ACBD5</i>                                           | 0.2458     | 1.98                 |
| <i>MAD1L1</i>                                          | 0.2455     | 1.98                 |
| <i>COL2A1</i>                                          | 0.2453     | 1.97                 |
| <i>AC244034.3</i>                                      | 0.2446     | 1.97                 |
| <i>IFI30</i>                                           | 0.2433     | 1.96                 |
| <i>MBNL2</i>                                           | 0.2432     | 1.96                 |
| <i>RRN3P3</i>                                          | 0.2412     | 1.95                 |
| <i>XRCC4</i>                                           | 0.2386     | 1.94                 |
| <i>AC007342.3</i>                                      | 0.2378     | 1.93                 |

|                   |        |      |
|-------------------|--------|------|
| <i>DHX58</i>      | 0.2365 | 1.93 |
| <i>P3H1</i>       | 0.2357 | 1.92 |
| <i>NPDC1</i>      | 0.2348 | 1.92 |
| <i>GPALPP1</i>    | 0.2311 | 1.90 |
| <i>PELI2</i>      | 0.2309 | 1.90 |
| <i>ZNF677</i>     | 0.2287 | 1.89 |
| <i>SIGLEC1</i>    | 0.2270 | 1.88 |
| <i>ACA64</i>      | 0.2261 | 1.87 |
| <i>CASZ1</i>      | 0.2258 | 1.87 |
| <i>LINC02210</i>  | 0.2254 | 1.87 |
| <i>OSBPL1A</i>    | 0.2252 | 1.87 |
| <i>AC092910.3</i> | 0.2250 | 1.87 |
| <i>PLA2G12A</i>   | 0.2247 | 1.86 |
| <i>ZNF426</i>     | 0.2232 | 1.86 |
| <i>NEK7</i>       | 0.2232 | 1.86 |
| <i>ZCCHC8</i>     | 0.2222 | 1.85 |
| <i>H2AFJ</i>      | 0.2215 | 1.85 |
| <i>ALG10B</i>     | 0.2210 | 1.85 |
| <i>NNT</i>        | 0.2190 | 1.84 |
| <i>KLHL5</i>      | 0.2184 | 1.83 |
| <i>WDR48</i>      | 0.2184 | 1.83 |
| <i>HCCS</i>       | 0.2179 | 1.83 |
| <i>PMP22</i>      | 0.2179 | 1.83 |
| <i>AC083798.2</i> | 0.2168 | 1.82 |
| <i>TRIM10</i>     | 0.2166 | 1.82 |
| <i>COQ5</i>       | 0.2165 | 1.82 |
| <i>AASDHPPT</i>   | 0.2165 | 1.82 |
| <i>ZNF408</i>     | 0.2159 | 1.82 |
| <i>SRPK1</i>      | 0.2154 | 1.82 |
| <i>SLC39A10</i>   | 0.2148 | 1.81 |
| <i>TGFBR1</i>     | 0.2146 | 1.81 |
| <i>S1PR1</i>      | 0.2136 | 1.81 |
| <i>AC006387.1</i> | 0.2128 | 1.80 |
| <i>ERCC6</i>      | 0.2114 | 1.80 |
| <i>CLN5</i>       | 0.2109 | 1.79 |
| <i>MBTPS2</i>     | 0.2105 | 1.79 |
| <i>AARS</i>       | 0.2099 | 1.79 |
| <i>AL390728.4</i> | 0.2092 | 1.79 |
| <i>HEXDC</i>      | 0.2091 | 1.79 |
| <i>ZNF548</i>     | 0.2090 | 1.78 |
| <i>DNAJC24</i>    | 0.2083 | 1.78 |
| <i>AC006518.2</i> | 0.2073 | 1.78 |
| <i>RPL36A</i>     | 0.2071 | 1.78 |
| <i>MTHFSD</i>     | 0.2071 | 1.78 |
| <i>LINC00877</i>  | 0.2063 | 1.77 |
| <i>TMEM218</i>    | 0.2037 | 1.76 |
| <i>snoU13</i>     | 0.2037 | 1.76 |
| <i>CTSL</i>       | 0.1996 | 1.74 |

|                        |        |      |
|------------------------|--------|------|
| <i>RHBDD3</i>          | 0.1991 | 1.74 |
| <i>HHAT</i>            | 0.1990 | 1.74 |
| <i>RUFY3</i>           | 0.1990 | 1.74 |
| <i>SCMH1</i>           | 0.1986 | 1.73 |
| <i>CYP4F12</i>         | 0.1983 | 1.73 |
| <i>NDUFB5</i>          | 0.1971 | 1.73 |
| <i>CD1C</i>            | 0.1968 | 1.73 |
| <i>CCDC170</i>         | 0.1968 | 1.73 |
| <i>B4GALT4</i>         | 0.1967 | 1.73 |
| <i>METTL6</i>          | 0.1965 | 1.72 |
| <i>SLAMF1</i>          | 0.1964 | 1.72 |
| <i>IFI44</i>           | 0.1959 | 1.72 |
| <i>NSMCE4A</i>         | 0.1951 | 1.72 |
| <i>ENSG00000277048</i> | 0.1943 | 1.71 |
| <i>IGIP</i>            | 0.1938 | 1.71 |
| <i>CDH13</i>           | 0.1938 | 1.71 |
| <i>HKR1</i>            | 0.1936 | 1.71 |
| <i>NEK5</i>            | 0.1933 | 1.71 |
| <i>LINC00888</i>       | 0.1930 | 1.71 |
| <i>VWA8</i>            | 0.1930 | 1.71 |
| <i>AC007191.1</i>      | 0.1929 | 1.71 |
| <i>ABHD13</i>          | 0.1919 | 1.70 |
| <i>TRMT2A</i>          | 0.1902 | 1.69 |
| <i>KLF10</i>           | 0.1901 | 1.69 |
| <i>SEC22C</i>          | 0.1895 | 1.69 |
| <i>FAM96A</i>          | 0.1893 | 1.69 |
| <i>TMEM263</i>         | 0.1890 | 1.69 |
| <i>MKL2</i>            | 0.1888 | 1.69 |
| <i>PSMD12</i>          | 0.1880 | 1.68 |
| <i>TMEM243</i>         | 0.1877 | 1.68 |
| <i>CRAMP1</i>          | 0.1874 | 1.68 |
| <i>TXN</i>             | 0.1872 | 1.68 |
| <i>ZDHHC24</i>         | 0.1864 | 1.68 |
| <i>TLE1</i>            | 0.1863 | 1.68 |
| <i>AC018755.4</i>      | 0.1861 | 1.68 |
| <i>SIK3</i>            | 0.1860 | 1.67 |
| <i>BCL7B</i>           | 0.1859 | 1.67 |
| <i>PRPSAP1</i>         | 0.1856 | 1.67 |
| <i>CLEC10A</i>         | 0.1856 | 1.67 |
| <i>E4F1</i>            | 0.1853 | 1.67 |
| <i>COA4</i>            | 0.1852 | 1.67 |
| <i>LSM14B</i>          | 0.1851 | 1.67 |
| <i>ZNF219</i>          | 0.1850 | 1.67 |
| <i>SNAPC5</i>          | 0.1850 | 1.67 |
| <i>ZNF772</i>          | 0.1841 | 1.67 |
| <i>MIIP</i>            | 0.1837 | 1.66 |
| <i>OBSCN</i>           | 0.1837 | 1.66 |
| <i>COX10</i>           | 0.1831 | 1.66 |

|                   |        |      |
|-------------------|--------|------|
| <i>AC024909.3</i> | 0.1830 | 1.66 |
| <i>GCNA</i>       | 0.1826 | 1.66 |
| <i>C15orf61</i>   | 0.1822 | 1.66 |
| <i>ARHGAP6</i>    | 0.1822 | 1.66 |
| <i>MTAP</i>       | 0.1817 | 1.66 |
| <i>MSRA</i>       | 0.1817 | 1.66 |
| <i>INF2</i>       | 0.1816 | 1.65 |
| <i>PAAF1</i>      | 0.1814 | 1.65 |
| <i>S100A13</i>    | 0.1804 | 1.65 |
| <i>CCL4</i>       | 0.1802 | 1.65 |
| <i>CDPF1</i>      | 0.1801 | 1.65 |
| <i>AC015819.1</i> | 0.1796 | 1.65 |
| <i>SMIM13</i>     | 0.1789 | 1.64 |
| <i>UBQLN4</i>     | 0.1786 | 1.64 |
| <i>ZNF234</i>     | 0.1776 | 1.64 |
| <i>NAGLU</i>      | 0.1774 | 1.64 |
| <i>C12orf45</i>   | 0.1774 | 1.64 |
| <i>DIXDC1</i>     | 0.1773 | 1.63 |
| <i>ALOX12-AS1</i> | 0.1767 | 1.63 |
| <i>ZNF169</i>     | 0.1764 | 1.63 |
| <i>CD69</i>       | 0.1751 | 1.63 |
| <i>ZNF738</i>     | 0.1750 | 1.62 |
| <i>TECPR2</i>     | 0.1745 | 1.62 |
| <i>LINC01963</i>  | 0.1739 | 1.62 |
| <i>RPP38</i>      | 0.1734 | 1.62 |
| <i>SLC17A5</i>    | 0.1734 | 1.62 |
| <i>CLN3</i>       | 0.1733 | 1.62 |
| <i>CCDC189</i>    | 0.1732 | 1.62 |
| <i>ZBTB48</i>     | 0.1723 | 1.61 |
| <i>C16orf86</i>   | 0.1719 | 1.61 |
| <i>CASP9</i>      | 0.1718 | 1.61 |
| <i>B3GNTL1</i>    | 0.1717 | 1.61 |
| <i>MYO10</i>      | 0.1711 | 1.61 |
| <i>ARRDC3</i>     | 0.1711 | 1.61 |
| <i>MED25</i>      | 0.1710 | 1.61 |
| <i>TRIO</i>       | 0.1706 | 1.60 |
| <i>DOHH</i>       | 0.1700 | 1.60 |
| <i>BNIP3</i>      | 0.1698 | 1.60 |
| <i>ZNF230</i>     | 0.1697 | 1.60 |
| <i>EMC7</i>       | 0.1697 | 1.60 |
| <i>PMPCA</i>      | 0.1695 | 1.60 |
| <i>MTX3</i>       | 0.1694 | 1.60 |
| <i>MSH2</i>       | 0.1689 | 1.60 |
| <i>LRRC57</i>     | 0.1689 | 1.60 |
| <i>NUP133</i>     | 0.1688 | 1.60 |
| <i>ELOA</i>       | 0.1686 | 1.60 |
| <i>LYPLA1</i>     | 0.1685 | 1.60 |
| <i>ASCC3</i>      | 0.1684 | 1.60 |

|             |        |      |
|-------------|--------|------|
| ZNRD1       | 0.1680 | 1.59 |
| SELENOI     | 0.1678 | 1.59 |
| PRSS33      | 0.1672 | 1.59 |
| RNU6-817P   | 0.1669 | 1.59 |
| PIGO        | 0.1668 | 1.59 |
| LINC01504   | 0.1668 | 1.59 |
| WDFY1       | 0.1667 | 1.59 |
| ADGRE1      | 0.1666 | 1.59 |
| SFMBT2      | 0.1658 | 1.58 |
| ACTR6       | 0.1657 | 1.58 |
| TBCEL       | 0.1656 | 1.58 |
| REXO1       | 0.1655 | 1.58 |
| C2orf69     | 0.1654 | 1.58 |
| AC003102.1  | 0.1650 | 1.58 |
| PTRH2       | 0.1648 | 1.58 |
| SH2B2       | 0.1645 | 1.58 |
| USP39       | 0.1642 | 1.58 |
| TBC1D14     | 0.1642 | 1.58 |
| ZNF600      | 0.1638 | 1.58 |
| ZMYM4       | 0.1636 | 1.57 |
| PARP6       | 0.1635 | 1.57 |
| HIST1H2BD   | 0.1633 | 1.57 |
| DNM3        | 0.1631 | 1.57 |
| TP53        | 0.1630 | 1.57 |
| EIF2S1      | 0.1629 | 1.57 |
| KLF1        | 0.1629 | 1.57 |
| RNF26       | 0.1629 | 1.57 |
| ATP2B1-AS1  | 0.1626 | 1.57 |
| BAHCC1      | 0.1626 | 1.57 |
| AC020915.4  | 0.1624 | 1.57 |
| PAFAH2      | 0.1621 | 1.57 |
| IL18BP      | 0.1619 | 1.57 |
| EFCAB5      | 0.1617 | 1.57 |
| FUCA1       | 0.1617 | 1.57 |
| MCOLN2      | 0.1616 | 1.57 |
| FAM159A     | 0.1614 | 1.56 |
| ZFP82       | 0.1613 | 1.56 |
| CIAPIN1     | 0.1611 | 1.56 |
| TBC1D24     | 0.1608 | 1.56 |
| Z99755.3    | 0.1608 | 1.56 |
| MACROD2     | 0.1602 | 1.56 |
| OSBPL7      | 0.1601 | 1.56 |
| ARMC6       | 0.1594 | 1.56 |
| TMEM81      | 0.1592 | 1.56 |
| PCYOX1L     | 0.1590 | 1.55 |
| ADAMTS9-AS2 | 0.1589 | 1.55 |
| CBR3        | 0.1587 | 1.55 |
| YIPF6       | 0.1586 | 1.55 |

|                   |        |      |
|-------------------|--------|------|
| <i>TMED3</i>      | 0.1583 | 1.55 |
| <i>SLC35B4</i>    | 0.1582 | 1.55 |
| <i>RAD18</i>      | 0.1582 | 1.55 |
| <i>MTRR</i>       | 0.1582 | 1.55 |
| <i>PLEKHM1P1</i>  | 0.1580 | 1.55 |
| <i>CYB5D2</i>     | 0.1578 | 1.55 |
| <i>PCNX4</i>      | 0.1577 | 1.55 |
| <i>EDEM1</i>      | 0.1574 | 1.55 |
| <i>SLC46A2</i>    | 0.1573 | 1.55 |
| <i>ZNF671</i>     | 0.1572 | 1.55 |
| <i>RPA3</i>       | 0.1572 | 1.55 |
| <i>MCCC2</i>      | 0.1571 | 1.55 |
| <i>MRPL37</i>     | 0.1570 | 1.55 |
| <i>SMAD4</i>      | 0.1569 | 1.54 |
| <i>PGS1</i>       | 0.1568 | 1.54 |
| <i>DBT</i>        | 0.1568 | 1.54 |
| <i>TESK1</i>      | 0.1568 | 1.54 |
| <i>ZNF517</i>     | 0.1568 | 1.54 |
| <i>LRRC1</i>      | 0.1562 | 1.54 |
| <i>MYO3</i>       | 0.1561 | 1.54 |
| <i>AC005332.9</i> | 0.1559 | 1.54 |
| <i>LINC01353</i>  | 0.1558 | 1.54 |
| <i>SLC35B3</i>    | 0.1558 | 1.54 |
| <i>ABL1</i>       | 0.1557 | 1.54 |
| <i>AQP10</i>      | 0.1556 | 1.54 |
| <i>ATF7IP2</i>    | 0.1555 | 1.54 |
| <i>SGSM3</i>      | 0.1554 | 1.54 |
| <i>AC079416.1</i> | 0.1553 | 1.54 |
| <i>PNMA1</i>      | 0.1552 | 1.54 |
| <i>MYH11</i>      | 0.1549 | 1.54 |
| <i>MPC2</i>       | 0.1548 | 1.54 |
| <i>TMEM183A</i>   | 0.1548 | 1.54 |
| <i>AC024293.1</i> | 0.1545 | 1.53 |
| <i>C8orf31</i>    | 0.1544 | 1.53 |
| <i>ITPR1</i>      | 0.1544 | 1.53 |
| <i>BRAT1</i>      | 0.1544 | 1.53 |
| <i>ZNF329</i>     | 0.1542 | 1.53 |
| <i>C5orf30</i>    | 0.1538 | 1.53 |
| <i>RBM4B</i>      | 0.1537 | 1.53 |
| <i>LINC00520</i>  | 0.1535 | 1.53 |
| <i>NAT6</i>       | 0.1534 | 1.53 |
| <i>GSTM3</i>      | 0.1533 | 1.53 |
| <i>IFT122</i>     | 0.1530 | 1.53 |
| <i>TTPAL</i>      | 0.1530 | 1.53 |
| <i>MRPS10</i>     | 0.1528 | 1.53 |
| <i>SNX24</i>      | 0.1528 | 1.53 |
| <i>UROS</i>       | 0.1527 | 1.53 |
| <i>AC040977.1</i> | 0.1527 | 1.53 |

|                   |        |      |
|-------------------|--------|------|
| <i>AC007382.1</i> | 0.1526 | 1.53 |
| <i>ZBTB33</i>     | 0.1524 | 1.53 |
| <i>ZNF619</i>     | 0.1522 | 1.52 |
| <i>FAM234A</i>    | 0.1521 | 1.52 |
| <i>TPCN1</i>      | 0.1518 | 1.52 |
| <i>ZNF699</i>     | 0.1518 | 1.52 |
| <i>ADAMTS5</i>    | 0.1517 | 1.52 |
| <i>GRAMD1B</i>    | 0.1516 | 1.52 |
| <i>C22orf29</i>   | 0.1512 | 1.52 |
| <i>CRADD</i>      | 0.1512 | 1.52 |
| <i>RRM1</i>       | 0.1505 | 1.52 |
| <i>AC011379.1</i> | 0.1501 | 1.52 |
| <i>GHRLOS</i>     | 0.1499 | 1.52 |
| <i>ELMO1</i>      | 0.1495 | 1.51 |
| <i>ATG9B</i>      | 0.1493 | 1.51 |
| <i>FUNDC2</i>     | 0.1491 | 1.51 |
| <i>ZNF75A</i>     | 0.1488 | 1.51 |
| <i>NABP2</i>      | 0.1484 | 1.51 |
| <i>TMEM186</i>    | 0.1483 | 1.51 |
| <i>ACTR5</i>      | 0.1483 | 1.51 |
| <i>NR2C2</i>      | 0.1482 | 1.51 |
| <i>RN7SL32P</i>   | 0.1482 | 1.51 |
| <i>TBC1D31</i>    | 0.1479 | 1.51 |
| <i>LUC7L</i>      | 0.1478 | 1.51 |
| <i>MTHFD2P1</i>   | 0.1476 | 1.51 |
| <i>HLA-DQA2</i>   | 0.1476 | 1.51 |
| <i>CREB3</i>      | 0.1473 | 1.50 |
| <i>NLN</i>        | 0.1472 | 1.50 |
| <i>REC8</i>       | 0.1471 | 1.50 |
| <i>GPR137</i>     | 0.1470 | 1.50 |
| <i>PNPO</i>       | 0.1469 | 1.50 |
| <i>SGMS1-AS1</i>  | 0.1469 | 1.50 |
| <i>DNAH6</i>      | 0.1468 | 1.50 |
| <i>ZNF853</i>     | 0.1468 | 1.50 |
| <i>AC245060.5</i> | 0.1467 | 1.50 |
| <i>AL645568.1</i> | 0.1466 | 1.50 |
| <i>XRCC3</i>      | 0.1466 | 1.50 |
| <i>ZNF248</i>     | 0.1464 | 1.50 |
| <i>TERF1</i>      | 0.1464 | 1.50 |

**Downregulated in association with PerceivedStress**

|               |         |      |
|---------------|---------|------|
| <i>ANKHD1</i> | -0.1464 | 0.67 |
| <i>GRHL1</i>  | -0.1464 | 0.67 |
| <i>ACVR2A</i> | -0.1464 | 0.67 |
| <i>MYL9</i>   | -0.1465 | 0.67 |
| <i>SARM1</i>  | -0.1465 | 0.67 |
| <i>S1PR2</i>  | -0.1466 | 0.67 |
| <i>KLHDC3</i> | -0.1467 | 0.67 |

|                    |         |      |
|--------------------|---------|------|
| <i>CAPRIN1</i>     | -0.1468 | 0.67 |
| <i>PTGS2</i>       | -0.1468 | 0.67 |
| <i>CR2</i>         | -0.1469 | 0.67 |
| <i>TIMM23</i>      | -0.1469 | 0.67 |
| <i>DMPK</i>        | -0.1470 | 0.67 |
| <i>ELK1</i>        | -0.1471 | 0.67 |
| <i>ZNF606</i>      | -0.1471 | 0.67 |
| <i>AGTPBP1</i>     | -0.1472 | 0.66 |
| <i>DNHD1</i>       | -0.1472 | 0.66 |
| <i>RAB13</i>       | -0.1473 | 0.66 |
| <i>ZNF496</i>      | -0.1474 | 0.66 |
| <i>PEX1</i>        | -0.1474 | 0.66 |
| <i>SASS6</i>       | -0.1475 | 0.66 |
| <i>LSM11</i>       | -0.1476 | 0.66 |
| <i>INSIG1</i>      | -0.1476 | 0.66 |
| <i>RNF138</i>      | -0.1477 | 0.66 |
| <i>VPS37C</i>      | -0.1478 | 0.66 |
| <i>AC098864.1</i>  | -0.1478 | 0.66 |
| <i>GPR20</i>       | -0.1479 | 0.66 |
| <i>ARMC5</i>       | -0.1479 | 0.66 |
| <i>RANBP3</i>      | -0.1479 | 0.66 |
| <i>UTP6</i>        | -0.1479 | 0.66 |
| <i>TPPP3</i>       | -0.1479 | 0.66 |
| <i>SCRN2</i>       | -0.1480 | 0.66 |
| <i>RAB40C</i>      | -0.1480 | 0.66 |
| <i>TBL2</i>        | -0.1481 | 0.66 |
| <i>SLC25A42</i>    | -0.1485 | 0.66 |
| <i>CSRNP2</i>      | -0.1485 | 0.66 |
| <i>BRD8</i>        | -0.1488 | 0.66 |
| <i>GAL3ST4</i>     | -0.1488 | 0.66 |
| <i>ARID5B</i>      | -0.1489 | 0.66 |
| <i>CREBL2</i>      | -0.1489 | 0.66 |
| <i>UBR1</i>        | -0.1489 | 0.66 |
| <i>PLEKHG1</i>     | -0.1489 | 0.66 |
| <i>SMU1</i>        | -0.1491 | 0.66 |
| <i>ABCA3</i>       | -0.1493 | 0.66 |
| <i>AVEN</i>        | -0.1494 | 0.66 |
| <i>GSDMB</i>       | -0.1498 | 0.66 |
| <i>ZMYND8</i>      | -0.1500 | 0.66 |
| <i>ITGAV</i>       | -0.1500 | 0.66 |
| <i>MAP3K7</i>      | -0.1500 | 0.66 |
| <i>SLC24A3</i>     | -0.1501 | 0.66 |
| <i>TIPRL</i>       | -0.1502 | 0.66 |
| <i>AC020978.10</i> | -0.1503 | 0.66 |
| <i>WDR27</i>       | -0.1503 | 0.66 |
| <i>TOPBP1</i>      | -0.1503 | 0.66 |
| <i>WDR60</i>       | -0.1503 | 0.66 |
| <i>SNORA74</i>     | -0.1504 | 0.66 |



|                 |         |      |
|-----------------|---------|------|
| ZNF783          | -0.1504 | 0.66 |
| HYAL3           | -0.1504 | 0.66 |
| RTN4IP1         | -0.1504 | 0.66 |
| SVIL            | -0.1505 | 0.66 |
| ZNF354A         | -0.1506 | 0.66 |
| AP003068.2      | -0.1508 | 0.66 |
| MAP1S           | -0.1509 | 0.66 |
| MLH3            | -0.1509 | 0.66 |
| KCTD13          | -0.1510 | 0.66 |
| MTMR11          | -0.1510 | 0.66 |
| CCRL2           | -0.1511 | 0.66 |
| SPTY2D1         | -0.1511 | 0.66 |
| ERMARD          | -0.1514 | 0.66 |
| AK5             | -0.1515 | 0.66 |
| BAP1            | -0.1516 | 0.66 |
| ABHD6           | -0.1516 | 0.66 |
| ZBTB14          | -0.1517 | 0.66 |
| FAM96B          | -0.1518 | 0.66 |
| LINC00667       | -0.1520 | 0.66 |
| GLRX3           | -0.1520 | 0.66 |
| AL136454.1      | -0.1520 | 0.66 |
| SGO2            | -0.1523 | 0.66 |
| SNAPC1          | -0.1523 | 0.66 |
| MTFR1           | -0.1524 | 0.66 |
| TBC1D4          | -0.1524 | 0.66 |
| HIST1H2BG       | -0.1525 | 0.66 |
| MTMR4           | -0.1525 | 0.66 |
| ITSN1           | -0.1526 | 0.65 |
| RSL24D1         | -0.1527 | 0.65 |
| KPNA2           | -0.1527 | 0.65 |
| RARA-AS1        | -0.1527 | 0.65 |
| SUMO2           | -0.1528 | 0.65 |
| PRRT3           | -0.1528 | 0.65 |
| THBD            | -0.1528 | 0.65 |
| PDE9A           | -0.1529 | 0.65 |
| VPS16           | -0.1530 | 0.65 |
| CAHM            | -0.1530 | 0.65 |
| TENM1           | -0.1531 | 0.65 |
| KCNE1           | -0.1532 | 0.65 |
| ENSG00000271430 | -0.1533 | 0.65 |
| RTCA            | -0.1534 | 0.65 |
| CHCHD4          | -0.1534 | 0.65 |
| RAD51C          | -0.1534 | 0.65 |
| IFT20           | -0.1534 | 0.65 |
| ACTL10          | -0.1534 | 0.65 |
| ABHD17B         | -0.1535 | 0.65 |
| PER1            | -0.1535 | 0.65 |
| PRDM9           | -0.1536 | 0.65 |

|                   |         |      |
|-------------------|---------|------|
| <i>UTP18</i>      | -0.1538 | 0.65 |
| <i>SLC5A6</i>     | -0.1539 | 0.65 |
| <i>SCN1B</i>      | -0.1540 | 0.65 |
| <i>MCM6</i>       | -0.1540 | 0.65 |
| <i>CHCHD7</i>     | -0.1541 | 0.65 |
| <i>TBC1D20</i>    | -0.1542 | 0.65 |
| <i>IFNGR1</i>     | -0.1542 | 0.65 |
| <i>CEP126</i>     | -0.1542 | 0.65 |
| <i>TARSL2</i>     | -0.1543 | 0.65 |
| <i>RGS9</i>       | -0.1546 | 0.65 |
| <i>LIN7C</i>      | -0.1547 | 0.65 |
| <i>PTPN22</i>     | -0.1547 | 0.65 |
| <i>RHOU</i>       | -0.1549 | 0.65 |
| <i>QDPR</i>       | -0.1550 | 0.65 |
| <i>VPS50</i>      | -0.1550 | 0.65 |
| <i>JUP</i>        | -0.1551 | 0.65 |
| <i>HDHD5</i>      | -0.1552 | 0.65 |
| <i>AMZ2</i>       | -0.1552 | 0.65 |
| <i>ZNF321P</i>    | -0.1553 | 0.65 |
| <i>SRPRA</i>      | -0.1554 | 0.65 |
| <i>C14orf80</i>   | -0.1554 | 0.65 |
| <i>SUMF1</i>      | -0.1554 | 0.65 |
| <i>C2CD2</i>      | -0.1557 | 0.65 |
| <i>PROSER3</i>    | -0.1559 | 0.65 |
| <i>CEP19</i>      | -0.1560 | 0.65 |
| <i>GK5</i>        | -0.1560 | 0.65 |
| <i>DNAJA2</i>     | -0.1563 | 0.65 |
| <i>TXNDC12</i>    | -0.1563 | 0.65 |
| <i>SLC38A5</i>    | -0.1564 | 0.65 |
| <i>EXOSC1</i>     | -0.1567 | 0.65 |
| <i>AC008555.8</i> | -0.1568 | 0.65 |
| <i>NAA25</i>      | -0.1570 | 0.65 |
| <i>C16orf58</i>   | -0.1571 | 0.65 |
| <i>PHF2</i>       | -0.1571 | 0.65 |
| <i>ZNF324</i>     | -0.1572 | 0.65 |
| <i>VPS26A</i>     | -0.1572 | 0.65 |
| <i>HAUS3</i>      | -0.1572 | 0.65 |
| <i>SLC2A1-AS1</i> | -0.1574 | 0.65 |
| <i>ASNS</i>       | -0.1574 | 0.65 |
| <i>ZNF251</i>     | -0.1575 | 0.65 |
| <i>AC092123.2</i> | -0.1576 | 0.65 |
| <i>ZFP36</i>      | -0.1578 | 0.65 |
| <i>AL021707.6</i> | -0.1578 | 0.65 |
| <i>AC004585.1</i> | -0.1578 | 0.65 |
| <i>CRTAM</i>      | -0.1580 | 0.65 |
| <i>PIGC</i>       | -0.1581 | 0.65 |
| <i>UTP4</i>       | -0.1581 | 0.65 |
| <i>AC093323.2</i> | -0.1581 | 0.65 |

|                   |         |      |
|-------------------|---------|------|
| <i>ICAM1</i>      | -0.1583 | 0.64 |
| <i>HIST3H2A</i>   | -0.1583 | 0.64 |
| <i>CRLF3</i>      | -0.1584 | 0.64 |
| <i>UHRF1BP1L</i>  | -0.1586 | 0.64 |
| <i>KIFC3</i>      | -0.1586 | 0.64 |
| <i>AC127024.4</i> | -0.1588 | 0.64 |
| <i>CCDC22</i>     | -0.1589 | 0.64 |
| <i>BCL10</i>      | -0.1589 | 0.64 |
| <i>AP000347.1</i> | -0.1590 | 0.64 |
| <i>TOP3A</i>      | -0.1592 | 0.64 |
| <i>MTRNR2L1</i>   | -0.1592 | 0.64 |
| <i>CYSTM1</i>     | -0.1592 | 0.64 |
| <i>TBC1D10A</i>   | -0.1593 | 0.64 |
| <i>RNF113A</i>    | -0.1593 | 0.64 |
| <i>ACTR1A</i>     | -0.1593 | 0.64 |
| <i>GNAZ</i>       | -0.1596 | 0.64 |
| <i>PMS1</i>       | -0.1596 | 0.64 |
| <i>EEFSEC</i>     | -0.1597 | 0.64 |
| <i>NABP1</i>      | -0.1597 | 0.64 |
| <i>AC243964.3</i> | -0.1598 | 0.64 |
| <i>ZFYVE28</i>    | -0.1598 | 0.64 |
| <i>SPRY1</i>      | -0.1599 | 0.64 |
| <i>GNPNAT1</i>    | -0.1600 | 0.64 |
| <i>TUBD1</i>      | -0.1602 | 0.64 |
| <i>NDC1</i>       | -0.1605 | 0.64 |
| <i>AIM2</i>       | -0.1608 | 0.64 |
| <i>IGHG4</i>      | -0.1608 | 0.64 |
| <i>CHFR</i>       | -0.1608 | 0.64 |
| <i>RN7SL336P</i>  | -0.1610 | 0.64 |
| <i>CSRNP1</i>     | -0.1612 | 0.64 |
| <i>SUZ12</i>      | -0.1613 | 0.64 |
| <i>DIP2B</i>      | -0.1615 | 0.64 |
| <i>MSRB3</i>      | -0.1616 | 0.64 |
| <i>CSE1L</i>      | -0.1616 | 0.64 |
| <i>SRGAP2</i>     | -0.1617 | 0.64 |
| <i>FNDC3B</i>     | -0.1618 | 0.64 |
| <i>SLC9A8</i>     | -0.1618 | 0.64 |
| <i>LEPROT</i>     | -0.1618 | 0.64 |
| <i>HSDL2</i>      | -0.1619 | 0.64 |
| <i>GCSAM</i>      | -0.1619 | 0.64 |
| <i>CD40</i>       | -0.1620 | 0.64 |
| <i>AL121944.1</i> | -0.1620 | 0.64 |
| <i>PRNCR1</i>     | -0.1622 | 0.64 |
| <i>PPID</i>       | -0.1623 | 0.64 |
| <i>ZNF524</i>     | -0.1624 | 0.64 |
| <i>AL731557.1</i> | -0.1627 | 0.64 |
| <i>CD1A</i>       | -0.1627 | 0.64 |
| <i>SLC4A2</i>     | -0.1627 | 0.64 |

|                   |         |      |
|-------------------|---------|------|
| <i>IKZF2</i>      | -0.1628 | 0.64 |
| <i>U62317.5</i>   | -0.1628 | 0.64 |
| <i>FUK</i>        | -0.1629 | 0.64 |
| <i>VAV2</i>       | -0.1630 | 0.64 |
| <i>SETD3</i>      | -0.1631 | 0.64 |
| <i>UBE2E1</i>     | -0.1632 | 0.64 |
| <i>RLF</i>        | -0.1632 | 0.64 |
| <i>EPHX2</i>      | -0.1633 | 0.64 |
| <i>SPATA20</i>    | -0.1633 | 0.64 |
| <i>ZNF224</i>     | -0.1635 | 0.64 |
| <i>ZNF302</i>     | -0.1635 | 0.64 |
| <i>LGALS3BP</i>   | -0.1636 | 0.64 |
| <i>HSD17B7</i>    | -0.1636 | 0.64 |
| <i>NFKBIB</i>     | -0.1637 | 0.64 |
| <i>RNF144B</i>    | -0.1637 | 0.64 |
| <i>FCRL5</i>      | -0.1638 | 0.63 |
| <i>RANBP1</i>     | -0.1640 | 0.63 |
| <i>LINC00511</i>  | -0.1640 | 0.63 |
| <i>RMND5A</i>     | -0.1642 | 0.63 |
| <i>ALMS1</i>      | -0.1643 | 0.63 |
| <i>ZNF260</i>     | -0.1645 | 0.63 |
| <i>LIN7B</i>      | -0.1647 | 0.63 |
| <i>ARHGAP35</i>   | -0.1647 | 0.63 |
| <i>AP000437.1</i> | -0.1648 | 0.63 |
| <i>FZR1</i>       | -0.1648 | 0.63 |
| <i>MALSU1</i>     | -0.1649 | 0.63 |
| <i>DALRD3</i>     | -0.1649 | 0.63 |
| <i>BCL9L</i>      | -0.1649 | 0.63 |
| <i>IDNK</i>       | -0.1651 | 0.63 |
| <i>ZW10</i>       | -0.1651 | 0.63 |
| <i>SLC16A7</i>    | -0.1652 | 0.63 |
| <i>AIMP1</i>      | -0.1654 | 0.63 |
| <i>FANCL</i>      | -0.1655 | 0.63 |
| <i>ASPSCR1</i>    | -0.1655 | 0.63 |
| <i>RN7SL329P</i>  | -0.1655 | 0.63 |
| <i>KYNU</i>       | -0.1656 | 0.63 |
| <i>SREBF1</i>     | -0.1656 | 0.63 |
| <i>AC245452.1</i> | -0.1656 | 0.63 |
| <i>SESTD1</i>     | -0.1662 | 0.63 |
| <i>GALNT2</i>     | -0.1662 | 0.63 |
| <i>PRAG1</i>      | -0.1662 | 0.63 |
| <i>PARP15</i>     | -0.1663 | 0.63 |
| <i>GALC</i>       | -0.1663 | 0.63 |
| <i>C11orf57</i>   | -0.1664 | 0.63 |
| <i>PPTC7</i>      | -0.1665 | 0.63 |
| <i>SNAPC3</i>     | -0.1665 | 0.63 |
| <i>ZNF800</i>     | -0.1667 | 0.63 |
| <i>INTS13</i>     | -0.1668 | 0.63 |

|                        |         |      |
|------------------------|---------|------|
| <i>CATSPERB</i>        | -0.1672 | 0.63 |
| <i>GTF2H3</i>          | -0.1674 | 0.63 |
| <i>LCMT2</i>           | -0.1675 | 0.63 |
| <i>AC002044.1</i>      | -0.1676 | 0.63 |
| <i>ENSG00000281350</i> | -0.1676 | 0.63 |
| <i>GIPR</i>            | -0.1676 | 0.63 |
| <i>WASH2P</i>          | -0.1678 | 0.63 |
| <i>C7orf50</i>         | -0.1678 | 0.63 |
| <i>C8orf76</i>         | -0.1678 | 0.63 |
| <i>GPD2</i>            | -0.1679 | 0.63 |
| <i>MRS2</i>            | -0.1680 | 0.63 |
| <i>ARID3B</i>          | -0.1680 | 0.63 |
| <i>MRPL36</i>          | -0.1681 | 0.63 |
| <i>TCTEX1D2</i>        | -0.1681 | 0.63 |
| <i>ST3GAL5</i>         | -0.1681 | 0.63 |
| <i>ZNF75D</i>          | -0.1681 | 0.63 |
| <i>ROBO3</i>           | -0.1682 | 0.63 |
| <i>NOMO1</i>           | -0.1682 | 0.63 |
| <i>ZDHHC2</i>          | -0.1683 | 0.63 |
| <i>TAMM41</i>          | -0.1685 | 0.63 |
| <i>FAM222B</i>         | -0.1686 | 0.63 |
| <i>GAN</i>             | -0.1686 | 0.63 |
| <i>RIC1</i>            | -0.1687 | 0.63 |
| <i>USO1</i>            | -0.1687 | 0.63 |
| <i>POLR1B</i>          | -0.1687 | 0.63 |
| <i>SNHG19</i>          | -0.1688 | 0.63 |
| <i>BZW2</i>            | -0.1688 | 0.63 |
| <i>EPS15L1</i>         | -0.1689 | 0.63 |
| <i>ZNF776</i>          | -0.1689 | 0.63 |
| <i>LINC00959</i>       | -0.1690 | 0.63 |
| <i>NTNG2</i>           | -0.1691 | 0.63 |
| <i>AC099689.1</i>      | -0.1692 | 0.63 |
| <i>CD226</i>           | -0.1693 | 0.63 |
| <i>ATG10</i>           | -0.1694 | 0.63 |
| <i>PNO1</i>            | -0.1694 | 0.63 |
| <i>ANKRD36C</i>        | -0.1695 | 0.63 |
| <i>AC243960.1</i>      | -0.1697 | 0.62 |
| <i>ATG4D</i>           | -0.1697 | 0.62 |
| <i>TSPYL2</i>          | -0.1698 | 0.62 |
| <i>DHX37</i>           | -0.1700 | 0.62 |
| <i>PDE4DIP</i>         | -0.1700 | 0.62 |
| <i>NEDD4L</i>          | -0.1701 | 0.62 |
| <i>RANBP6</i>          | -0.1701 | 0.62 |
| <i>NBPF11</i>          | -0.1701 | 0.62 |
| <i>ZNF562</i>          | -0.1702 | 0.62 |
| <i>TUBB2A</i>          | -0.1705 | 0.62 |
| <i>C6orf226</i>        | -0.1707 | 0.62 |
| <i>ARL16</i>           | -0.1708 | 0.62 |

|                   |         |      |
|-------------------|---------|------|
| <i>TIMM21</i>     | -0.1709 | 0.62 |
| <i>DDHD1</i>      | -0.1710 | 0.62 |
| <i>SLC38A7</i>    | -0.1711 | 0.62 |
| <i>SLC24A4</i>    | -0.1711 | 0.62 |
| <i>AL109809.4</i> | -0.1712 | 0.62 |
| <i>YWHAQ</i>      | -0.1713 | 0.62 |
| <i>DCTPP1</i>     | -0.1714 | 0.62 |
| <i>SLC39A8</i>    | -0.1714 | 0.62 |
| <i>LINC00484</i>  | -0.1714 | 0.62 |
| <i>NOL8</i>       | -0.1716 | 0.62 |
| <i>SLC11A2</i>    | -0.1720 | 0.62 |
| <i>DENR</i>       | -0.1721 | 0.62 |
| <i>SAR1B</i>      | -0.1721 | 0.62 |
| <i>CNNM3</i>      | -0.1721 | 0.62 |
| <i>HEATR6</i>     | -0.1723 | 0.62 |
| <i>HMBOX1</i>     | -0.1724 | 0.62 |
| <i>GPRIN3</i>     | -0.1726 | 0.62 |
| <i>RNASEL</i>     | -0.1728 | 0.62 |
| <i>SLC2A11</i>    | -0.1728 | 0.62 |
| <i>ZFPM1</i>      | -0.1729 | 0.62 |
| <i>KIAA0368</i>   | -0.1731 | 0.62 |
| <i>ZNF827</i>     | -0.1731 | 0.62 |
| <i>AMZ2P1</i>     | -0.1732 | 0.62 |
| <i>REV1</i>       | -0.1733 | 0.62 |
| <i>BRWD3</i>      | -0.1735 | 0.62 |
| <i>NUP88</i>      | -0.1735 | 0.62 |
| <i>HMBS</i>       | -0.1736 | 0.62 |
| <i>YAE1D1</i>     | -0.1739 | 0.62 |
| <i>GPATCH4</i>    | -0.1740 | 0.62 |
| <i>AC009120.2</i> | -0.1742 | 0.62 |
| <i>ZNF394</i>     | -0.1742 | 0.62 |
| <i>MOB3B</i>      | -0.1743 | 0.62 |
| <i>NOM1</i>       | -0.1744 | 0.62 |
| <i>FMN1</i>       | -0.1746 | 0.62 |
| <i>FUT4</i>       | -0.1746 | 0.62 |
| <i>GPS2</i>       | -0.1749 | 0.62 |
| <i>ASAP2</i>      | -0.1749 | 0.62 |
| <i>ZNF579</i>     | -0.1751 | 0.62 |
| <i>NOP10</i>      | -0.1751 | 0.62 |
| <i>CCDC90B</i>    | -0.1751 | 0.62 |
| <i>AC142472.1</i> | -0.1751 | 0.62 |
| <i>C9orf72</i>    | -0.1752 | 0.62 |
| <i>COPS2</i>      | -0.1753 | 0.62 |
| <i>CMAS</i>       | -0.1753 | 0.62 |
| <i>C1orf159</i>   | -0.1753 | 0.62 |
| <i>R3HDM1</i>     | -0.1754 | 0.61 |
| <i>ANAPC7</i>     | -0.1755 | 0.61 |
| <i>IPCEF1</i>     | -0.1755 | 0.61 |

|                   |         |      |
|-------------------|---------|------|
| <i>SZT2</i>       | -0.1756 | 0.61 |
| <i>SLC37A1</i>    | -0.1757 | 0.61 |
| <i>LRRC14</i>     | -0.1758 | 0.61 |
| <i>SNX29</i>      | -0.1759 | 0.61 |
| <i>MIOS</i>       | -0.1759 | 0.61 |
| <i>GLYCK</i>      | -0.1761 | 0.61 |
| <i>ISCA2</i>      | -0.1761 | 0.61 |
| <i>PBX4</i>       | -0.1762 | 0.61 |
| <i>NAPB</i>       | -0.1762 | 0.61 |
| <i>LCMT1</i>      | -0.1762 | 0.61 |
| <i>GPN3</i>       | -0.1762 | 0.61 |
| <i>CRY1</i>       | -0.1762 | 0.61 |
| <i>PGM2L1</i>     | -0.1765 | 0.61 |
| <i>AC083862.2</i> | -0.1766 | 0.61 |
| <i>XPNPEP1</i>    | -0.1767 | 0.61 |
| <i>ZNF268</i>     | -0.1768 | 0.61 |
| <i>NUMBL</i>      | -0.1768 | 0.61 |
| <i>MPHOSPH9</i>   | -0.1768 | 0.61 |
| <i>AL035071.1</i> | -0.1770 | 0.61 |
| <i>RHNO1</i>      | -0.1771 | 0.61 |
| <i>CRYBG3</i>     | -0.1771 | 0.61 |
| <i>RPAP3</i>      | -0.1772 | 0.61 |
| <i>OSGEPL1</i>    | -0.1773 | 0.61 |
| <i>ENO2</i>       | -0.1773 | 0.61 |
| <i>PLPBP</i>      | -0.1777 | 0.61 |
| <i>AC147651.3</i> | -0.1778 | 0.61 |
| <i>IFFO2</i>      | -0.1778 | 0.61 |
| <i>DLG5</i>       | -0.1779 | 0.61 |
| <i>SOWAHD</i>     | -0.1783 | 0.61 |
| <i>SLC22A18</i>   | -0.1784 | 0.61 |
| <i>METTL17</i>    | -0.1785 | 0.61 |
| <i>HSPBAP1</i>    | -0.1785 | 0.61 |
| <i>C7orf31</i>    | -0.1786 | 0.61 |
| <i>ABCD3</i>      | -0.1786 | 0.61 |
| <i>PDZD8</i>      | -0.1786 | 0.61 |
| <i>CCDC71</i>     | -0.1788 | 0.61 |
| <i>UBE2Q2P1</i>   | -0.1788 | 0.61 |
| <i>PSMC2</i>      | -0.1788 | 0.61 |
| <i>ARMC8</i>      | -0.1789 | 0.61 |
| <i>METTL12</i>    | -0.1790 | 0.61 |
| <i>IDI1</i>       | -0.1790 | 0.61 |
| <i>TRAF5</i>      | -0.1794 | 0.61 |
| <i>DDX19A</i>     | -0.1794 | 0.61 |
| <i>MTOR</i>       | -0.1799 | 0.61 |
| <i>P4HTM</i>      | -0.1800 | 0.61 |
| <i>EIF4EBP1</i>   | -0.1800 | 0.61 |
| <i>NUP153</i>     | -0.1800 | 0.61 |
| <i>SLF2</i>       | -0.1802 | 0.61 |

|                   |         |      |
|-------------------|---------|------|
| <i>BICDL1</i>     | -0.1804 | 0.61 |
| <i>AL357033.4</i> | -0.1804 | 0.61 |
| <i>BARD1</i>      | -0.1806 | 0.61 |
| <i>ACACA</i>      | -0.1808 | 0.61 |
| <i>FOXK2</i>      | -0.1810 | 0.61 |
| <i>RAB4B</i>      | -0.1813 | 0.60 |
| <i>HLA-J</i>      | -0.1813 | 0.60 |
| <i>CCHCR1</i>     | -0.1814 | 0.60 |
| <i>KIZ</i>        | -0.1814 | 0.60 |
| <i>IGHMBP2</i>    | -0.1815 | 0.60 |
| <i>TRIM24</i>     | -0.1817 | 0.60 |
| <i>RAB39B</i>     | -0.1818 | 0.60 |
| <i>EMC3-AS1</i>   | -0.1818 | 0.60 |
| <i>FAM122B</i>    | -0.1821 | 0.60 |
| <i>ITCH</i>       | -0.1821 | 0.60 |
| <i>RAB32</i>      | -0.1822 | 0.60 |
| <i>ZNF117</i>     | -0.1824 | 0.60 |
| <i>RWDD1</i>      | -0.1824 | 0.60 |
| <i>KDM5B</i>      | -0.1825 | 0.60 |
| <i>CWF19L1</i>    | -0.1827 | 0.60 |
| <i>FDX1</i>       | -0.1827 | 0.60 |
| <i>TMEM99</i>     | -0.1830 | 0.60 |
| <i>CSGALNACT1</i> | -0.1832 | 0.60 |
| <i>YARS</i>       | -0.1832 | 0.60 |
| <i>CMC1</i>       | -0.1833 | 0.60 |
| <i>TMEM71</i>     | -0.1834 | 0.60 |
| <i>VASH1</i>      | -0.1834 | 0.60 |
| <i>ITPRIP</i>     | -0.1836 | 0.60 |
| <i>PNMA3</i>      | -0.1837 | 0.60 |
| <i>NCOA2</i>      | -0.1838 | 0.60 |
| <i>RPS6KA2</i>    | -0.1838 | 0.60 |
| <i>VAC14</i>      | -0.1838 | 0.60 |
| <i>RIN2</i>       | -0.1841 | 0.60 |
| <i>IGBP1</i>      | -0.1844 | 0.60 |
| <i>TMX2</i>       | -0.1845 | 0.60 |
| <i>PM20D2</i>     | -0.1845 | 0.60 |
| <i>RAB4A</i>      | -0.1845 | 0.60 |
| <i>LATS2</i>      | -0.1845 | 0.60 |
| <i>FAM20C</i>     | -0.1847 | 0.60 |
| <i>TMEM42</i>     | -0.1847 | 0.60 |
| <i>RECQL</i>      | -0.1848 | 0.60 |
| <i>JMJD6</i>      | -0.1848 | 0.60 |
| <i>NRBF2</i>      | -0.1849 | 0.60 |
| <i>KATNB1</i>     | -0.1849 | 0.60 |
| <i>MYCL</i>       | -0.1849 | 0.60 |
| <i>GPR108</i>     | -0.1851 | 0.60 |
| <i>PGM1</i>       | -0.1851 | 0.60 |
| <i>SLC37A3</i>    | -0.1852 | 0.60 |



|                   |         |      |
|-------------------|---------|------|
| <i>C12orf65</i>   | -0.1853 | 0.60 |
| <i>EXOSC9</i>     | -0.1854 | 0.60 |
| <i>MRPL13</i>     | -0.1856 | 0.60 |
| <i>FAM50A</i>     | -0.1858 | 0.60 |
| <i>MED27</i>      | -0.1858 | 0.60 |
| <i>CCNF</i>       | -0.1859 | 0.60 |
| <i>CCDC9</i>      | -0.1860 | 0.60 |
| <i>F5</i>         | -0.1861 | 0.60 |
| <i>Z95331.1</i>   | -0.1862 | 0.60 |
| <i>HMGCS1</i>     | -0.1865 | 0.60 |
| <i>NFU1</i>       | -0.1866 | 0.60 |
| <i>RMND5B</i>     | -0.1867 | 0.60 |
| <i>AMOT</i>       | -0.1871 | 0.60 |
| <i>ELP3</i>       | -0.1873 | 0.59 |
| <i>WDR91</i>      | -0.1873 | 0.59 |
| <i>PPP4R2</i>     | -0.1874 | 0.59 |
| <i>AL158152.1</i> | -0.1874 | 0.59 |
| <i>UBE2Q1</i>     | -0.1875 | 0.59 |
| <i>TJAP1</i>      | -0.1875 | 0.59 |
| <i>TATDN3</i>     | -0.1875 | 0.59 |
| <i>TMEM115</i>    | -0.1878 | 0.59 |
| <i>PPP2R5B</i>    | -0.1878 | 0.59 |
| <i>GTF3C3</i>     | -0.1879 | 0.59 |
| <i>LYRM1</i>      | -0.1880 | 0.59 |
| <i>SFT2D1</i>     | -0.1882 | 0.59 |
| <i>PWWP2B</i>     | -0.1884 | 0.59 |
| <i>CUEDC2</i>     | -0.1885 | 0.59 |
| <i>RUBCNL</i>     | -0.1887 | 0.59 |
| <i>METTL3</i>     | -0.1888 | 0.59 |
| <i>SDHB</i>       | -0.1889 | 0.59 |
| <i>RIOK1</i>      | -0.1891 | 0.59 |
| <i>FN3KRP</i>     | -0.1892 | 0.59 |
| <i>MIR646HG</i>   | -0.1893 | 0.59 |
| <i>PI4KB</i>      | -0.1895 | 0.59 |
| <i>AC018529.3</i> | -0.1896 | 0.59 |
| <i>KLF7</i>       | -0.1896 | 0.59 |
| <i>AC055839.1</i> | -0.1898 | 0.59 |
| <i>MVD</i>        | -0.1898 | 0.59 |
| <i>RPP30</i>      | -0.1899 | 0.59 |
| <i>KLF12</i>      | -0.1906 | 0.59 |
| <i>DZIP3</i>      | -0.1907 | 0.59 |
| <i>PAXIP1-AS1</i> | -0.1908 | 0.59 |
| <i>BAZ1B</i>      | -0.1910 | 0.59 |
| <i>RNF121</i>     | -0.1912 | 0.59 |
| <i>BLNK</i>       | -0.1914 | 0.59 |
| <i>AMPD3</i>      | -0.1915 | 0.59 |
| <i>TTC32</i>      | -0.1918 | 0.59 |
| <i>VAR5</i>       | -0.1920 | 0.59 |

|                   |         |      |
|-------------------|---------|------|
| <i>CCDC141</i>    | -0.1922 | 0.59 |
| <i>SCAF8</i>      | -0.1923 | 0.59 |
| <i>PET117</i>     | -0.1925 | 0.59 |
| <i>DDX55</i>      | -0.1926 | 0.59 |
| <i>IKZF5</i>      | -0.1927 | 0.59 |
| <i>ITGA6</i>      | -0.1927 | 0.59 |
| <i>MRM1</i>       | -0.1930 | 0.59 |
| <i>FANCA</i>      | -0.1930 | 0.59 |
| <i>SS18L2</i>     | -0.1931 | 0.59 |
| <i>RDH13</i>      | -0.1932 | 0.59 |
| <i>EXT1</i>       | -0.1933 | 0.59 |
| <i>HAVCR2</i>     | -0.1935 | 0.58 |
| <i>SLC25A1</i>    | -0.1937 | 0.58 |
| <i>LTBP1</i>      | -0.1939 | 0.58 |
| <i>AL844908.1</i> | -0.1940 | 0.58 |
| <i>EID2</i>       | -0.1943 | 0.58 |
| <i>PTCD1</i>      | -0.1943 | 0.58 |
| <i>AP4E1</i>      | -0.1944 | 0.58 |
| <i>SETD6</i>      | -0.1944 | 0.58 |
| <i>LYPLAL1</i>    | -0.1945 | 0.58 |
| <i>MCEMP1</i>     | -0.1947 | 0.58 |
| <i>AGPAT4</i>     | -0.1949 | 0.58 |
| <i>PSMG1</i>      | -0.1953 | 0.58 |
| <i>STXBP3</i>     | -0.1954 | 0.58 |
| <i>AEBP2</i>      | -0.1955 | 0.58 |
| <i>MRM3</i>       | -0.1955 | 0.58 |
| <i>TCEA2</i>      | -0.1956 | 0.58 |
| <i>LARP4</i>      | -0.1957 | 0.58 |
| <i>RAB18</i>      | -0.1958 | 0.58 |
| <i>KBTBD7</i>     | -0.1958 | 0.58 |
| <i>DOLK</i>       | -0.1961 | 0.58 |
| <i>PORCN</i>      | -0.1962 | 0.58 |
| <i>AC004865.2</i> | -0.1963 | 0.58 |
| <i>LMNB2</i>      | -0.1963 | 0.58 |
| <i>SRI</i>        | -0.1964 | 0.58 |
| <i>CTNNA1</i>     | -0.1965 | 0.58 |
| <i>AL391244.1</i> | -0.1966 | 0.58 |
| <i>C5orf15</i>    | -0.1966 | 0.58 |
| <i>NUDT19</i>     | -0.1967 | 0.58 |
| <i>ADNP</i>       | -0.1968 | 0.58 |
| <i>SUCO</i>       | -0.1969 | 0.58 |
| <i>TNKS2</i>      | -0.1970 | 0.58 |
| <i>BZW1</i>       | -0.1973 | 0.58 |
| <i>FAM35A</i>     | -0.1973 | 0.58 |
| <i>PIK3CA</i>     | -0.1973 | 0.58 |
| <i>TMEM181</i>    | -0.1974 | 0.58 |
| <i>TLL12</i>      | -0.1974 | 0.58 |
| <i>SNORD13E</i>   | -0.1975 | 0.58 |

|                   |         |      |
|-------------------|---------|------|
| <i>RAB27B</i>     | -0.1976 | 0.58 |
| <i>SLC46A3</i>    | -0.1977 | 0.58 |
| <i>PCDH9</i>      | -0.1978 | 0.58 |
| <i>IMPA2</i>      | -0.1979 | 0.58 |
| <i>ZNHIT2</i>     | -0.1983 | 0.58 |
| <i>GOLM1</i>      | -0.1985 | 0.58 |
| <i>PRKD3</i>      | -0.1986 | 0.58 |
| <i>PHF5A</i>      | -0.1987 | 0.58 |
| <i>TP53BP1</i>    | -0.1988 | 0.58 |
| <i>REPS2</i>      | -0.1995 | 0.58 |
| <i>SAP130</i>     | -0.1995 | 0.58 |
| <i>ACER3</i>      | -0.1998 | 0.57 |
| <i>HSF2</i>       | -0.2001 | 0.57 |
| <i>DENND6A</i>    | -0.2002 | 0.57 |
| <i>FOPNL</i>      | -0.2002 | 0.57 |
| <i>RPF2</i>       | -0.2004 | 0.57 |
| <i>CEP295</i>     | -0.2007 | 0.57 |
| <i>CD28</i>       | -0.2007 | 0.57 |
| <i>ITK</i>        | -0.2010 | 0.57 |
| <i>AKAP11</i>     | -0.2010 | 0.57 |
| <i>ZNF526</i>     | -0.2012 | 0.57 |
| <i>CDK9</i>       | -0.2014 | 0.57 |
| <i>IFI27L2</i>    | -0.2018 | 0.57 |
| <i>WDR41</i>      | -0.2019 | 0.57 |
| <i>MPZL3</i>      | -0.2022 | 0.57 |
| <i>DDIT4</i>      | -0.2024 | 0.57 |
| <i>GCLM</i>       | -0.2026 | 0.57 |
| <i>ZNF780B</i>    | -0.2028 | 0.57 |
| <i>E2F4</i>       | -0.2029 | 0.57 |
| <i>SLC39A1</i>    | -0.2029 | 0.57 |
| <i>MED8</i>       | -0.2030 | 0.57 |
| <i>STXBP5</i>     | -0.2032 | 0.57 |
| <i>ZNF346</i>     | -0.2034 | 0.57 |
| <i>ABHD8</i>      | -0.2034 | 0.57 |
| <i>GYG1</i>       | -0.2034 | 0.57 |
| <i>IRF4</i>       | -0.2036 | 0.57 |
| <i>TRIM59</i>     | -0.2037 | 0.57 |
| <i>FADS3</i>      | -0.2039 | 0.57 |
| <i>E2F6</i>       | -0.2041 | 0.57 |
| <i>RNF183</i>     | -0.2042 | 0.57 |
| <i>AC023090.2</i> | -0.2047 | 0.57 |
| <i>PREPL</i>      | -0.2050 | 0.57 |
| <i>NAT9</i>       | -0.2050 | 0.57 |
| <i>KAT8</i>       | -0.2051 | 0.57 |
| <i>ZNF518A</i>    | -0.2052 | 0.57 |
| <i>MYDGF</i>      | -0.2055 | 0.57 |
| <i>PRKRIP1</i>    | -0.2055 | 0.57 |
| <i>PRKCQ</i>      | -0.2058 | 0.57 |

|                   |         |      |
|-------------------|---------|------|
| <i>ATL3</i>       | -0.2058 | 0.57 |
| <i>AC002044.2</i> | -0.2063 | 0.56 |
| <i>DGAT2</i>      | -0.2064 | 0.56 |
| <i>UBASH3A</i>    | -0.2064 | 0.56 |
| <i>ETAA1</i>      | -0.2064 | 0.56 |
| <i>ANAPC4</i>     | -0.2064 | 0.56 |
| <i>SAFB</i>       | -0.2067 | 0.56 |
| <i>CERS6</i>      | -0.2068 | 0.56 |
| <i>C1orf27</i>    | -0.2077 | 0.56 |
| <i>TMEM33</i>     | -0.2081 | 0.56 |
| <i>FAF1</i>       | -0.2084 | 0.56 |
| <i>FBXO4</i>      | -0.2086 | 0.56 |
| <i>HEATR5A</i>    | -0.2087 | 0.56 |
| <i>ASCC1</i>      | -0.2091 | 0.56 |
| <i>POP5</i>       | -0.2092 | 0.56 |
| <i>MSRB2</i>      | -0.2094 | 0.56 |
| <i>CHUK</i>       | -0.2096 | 0.56 |
| <i>TBX19</i>      | -0.2096 | 0.56 |
| <i>WLS</i>        | -0.2097 | 0.56 |
| <i>FAS</i>        | -0.2099 | 0.56 |
| <i>SENP6</i>      | -0.2099 | 0.56 |
| <i>RAB20</i>      | -0.2101 | 0.56 |
| <i>HTRA2</i>      | -0.2102 | 0.56 |
| <i>ABCF2</i>      | -0.2102 | 0.56 |
| <i>DPM1</i>       | -0.2105 | 0.56 |
| <i>ITGA5</i>      | -0.2107 | 0.56 |
| <i>MED7</i>       | -0.2108 | 0.56 |
| <i>UCHL5</i>      | -0.2108 | 0.56 |
| <i>B3GALT4</i>    | -0.2110 | 0.56 |
| <i>EMC1</i>       | -0.2113 | 0.56 |
| <i>FLAD1</i>      | -0.2114 | 0.56 |
| <i>CEBPG</i>      | -0.2117 | 0.56 |
| <i>FBRSL1</i>     | -0.2120 | 0.56 |
| <i>ASGR2</i>      | -0.2121 | 0.56 |
| <i>AC092747.4</i> | -0.2122 | 0.56 |
| <i>OSBP2</i>      | -0.2124 | 0.55 |
| <i>RP2</i>        | -0.2129 | 0.55 |
| <i>ERMP1</i>      | -0.2130 | 0.55 |
| <i>TRNAU1AP</i>   | -0.2131 | 0.55 |
| <i>CLK4</i>       | -0.2133 | 0.55 |
| <i>STK36</i>      | -0.2133 | 0.55 |
| <i>MGMT</i>       | -0.2134 | 0.55 |
| <i>ARL4A</i>      | -0.2136 | 0.55 |
| <i>INPP1</i>      | -0.2137 | 0.55 |
| <i>YIPF2</i>      | -0.2138 | 0.55 |
| <i>HEATR5B</i>    | -0.2140 | 0.55 |
| <i>MRGBP</i>      | -0.2141 | 0.55 |
| <i>CPQ</i>        | -0.2144 | 0.55 |

|                   |         |      |
|-------------------|---------|------|
| <i>MALT1</i>      | -0.2144 | 0.55 |
| <i>MKKS</i>       | -0.2147 | 0.55 |
| <i>VPS29</i>      | -0.2148 | 0.55 |
| <i>PHLDB2</i>     | -0.2148 | 0.55 |
| <i>BOD1</i>       | -0.2156 | 0.55 |
| <i>CPM</i>        | -0.2156 | 0.55 |
| <i>NDUFA12</i>    | -0.2158 | 0.55 |
| <i>KIF21A</i>     | -0.2160 | 0.55 |
| <i>COPRS</i>      | -0.2161 | 0.55 |
| <i>PEAK1</i>      | -0.2164 | 0.55 |
| <i>NLRC3</i>      | -0.2167 | 0.55 |
| <i>CASP6</i>      | -0.2174 | 0.55 |
| <i>RRNAD1</i>     | -0.2182 | 0.55 |
| <i>MICALL1</i>    | -0.2182 | 0.55 |
| <i>NFYB</i>       | -0.2184 | 0.55 |
| <i>METTL15</i>    | -0.2189 | 0.55 |
| <i>LRRC42</i>     | -0.2189 | 0.54 |
| <i>MFSD2B</i>     | -0.2190 | 0.54 |
| <i>GFM1</i>       | -0.2191 | 0.54 |
| <i>CRIPT</i>      | -0.2195 | 0.54 |
| <i>FAM213A</i>    | -0.2200 | 0.54 |
| <i>SUGP1</i>      | -0.2200 | 0.54 |
| <i>NPHP3</i>      | -0.2202 | 0.54 |
| <i>LRSAM1</i>     | -0.2205 | 0.54 |
| <i>DNAJC16</i>    | -0.2208 | 0.54 |
| <i>ATP10D</i>     | -0.2209 | 0.54 |
| <i>MAPKAPK5</i>   | -0.2217 | 0.54 |
| <i>GALK2</i>      | -0.2225 | 0.54 |
| <i>POLK</i>       | -0.2230 | 0.54 |
| <i>TUT1</i>       | -0.2235 | 0.54 |
| <i>AL133245.1</i> | -0.2237 | 0.54 |
| <i>TFDP1</i>      | -0.2239 | 0.54 |
| <i>HPS3</i>       | -0.2242 | 0.54 |
| <i>GALNT11</i>    | -0.2243 | 0.54 |
| <i>RARS</i>       | -0.2245 | 0.54 |
| <i>CASP10</i>     | -0.2245 | 0.54 |
| <i>LZTR1</i>      | -0.2257 | 0.53 |
| <i>ZCWPW1</i>     | -0.2268 | 0.53 |
| <i>ZNF362</i>     | -0.2269 | 0.53 |
| <i>CYSLTR1</i>    | -0.2270 | 0.53 |
| <i>KIFAP3</i>     | -0.2270 | 0.53 |
| <i>PSEN2</i>      | -0.2271 | 0.53 |
| <i>NPL</i>        | -0.2272 | 0.53 |
| <i>METTL5</i>     | -0.2273 | 0.53 |
| <i>FCRLA</i>      | -0.2277 | 0.53 |
| <i>RCOR3</i>      | -0.2278 | 0.53 |
| <i>TMEM14C</i>    | -0.2278 | 0.53 |
| <i>IL3RA</i>      | -0.2283 | 0.53 |

|                   |         |      |
|-------------------|---------|------|
| <i>BFAR</i>       | -0.2290 | 0.53 |
| <i>IGFLR1</i>     | -0.2291 | 0.53 |
| <i>PPM1L</i>      | -0.2297 | 0.53 |
| <i>ZCCHC7</i>     | -0.2297 | 0.53 |
| <i>IMMP1L</i>     | -0.2301 | 0.53 |
| <i>MCU</i>        | -0.2305 | 0.53 |
| <i>TMEM107</i>    | -0.2305 | 0.53 |
| <i>KAT14</i>      | -0.2311 | 0.53 |
| <i>OGFOD1</i>     | -0.2313 | 0.53 |
| <i>XPO5</i>       | -0.2314 | 0.53 |
| <i>CCDC127</i>    | -0.2315 | 0.53 |
| <i>TREML1</i>     | -0.2317 | 0.53 |
| <i>CLASP2</i>     | -0.2318 | 0.53 |
| <i>OSER1-AS1</i>  | -0.2325 | 0.52 |
| <i>FAM118A</i>    | -0.2327 | 0.52 |
| <i>SLITRK4</i>    | -0.2328 | 0.52 |
| <i>SIRT5</i>      | -0.2329 | 0.52 |
| <i>RWDD4</i>      | -0.2330 | 0.52 |
| <i>LAIR2</i>      | -0.2331 | 0.52 |
| <i>BLMH</i>       | -0.2339 | 0.52 |
| <i>ANKRD54</i>    | -0.2341 | 0.52 |
| <i>PDP2</i>       | -0.2343 | 0.52 |
| <i>NCAPD2</i>     | -0.2346 | 0.52 |
| <i>SDAD1</i>      | -0.2356 | 0.52 |
| <i>KLHL2</i>      | -0.2358 | 0.52 |
| <i>FAF2</i>       | -0.2360 | 0.52 |
| <i>RAB11FIP2</i>  | -0.2361 | 0.52 |
| <i>DHX8</i>       | -0.2361 | 0.52 |
| <i>UBE2D1</i>     | -0.2361 | 0.52 |
| <i>VCPIP1</i>     | -0.2366 | 0.52 |
| <i>GLS</i>        | -0.2373 | 0.52 |
| <i>KIN</i>        | -0.2374 | 0.52 |
| <i>SLC6A8</i>     | -0.2375 | 0.52 |
| <i>PAICS</i>      | -0.2377 | 0.52 |
| <i>PRKCSH</i>     | -0.2385 | 0.52 |
| <i>NIPSNAP2</i>   | -0.2387 | 0.52 |
| <i>CDKN2AIP</i>   | -0.2389 | 0.52 |
| <i>MYB</i>        | -0.2389 | 0.52 |
| <i>ING1</i>       | -0.2393 | 0.52 |
| <i>METTL8</i>     | -0.2395 | 0.51 |
| <i>SGK1</i>       | -0.2397 | 0.51 |
| <i>AP002004.1</i> | -0.2398 | 0.51 |
| <i>CARD8-AS1</i>  | -0.2399 | 0.51 |
| <i>CLEC4A</i>     | -0.2399 | 0.51 |
| <i>PPP1R35</i>    | -0.2400 | 0.51 |
| <i>CDC42BPB</i>   | -0.2407 | 0.51 |
| <i>CS</i>         | -0.2407 | 0.51 |
| <i>ZNF107</i>     | -0.2412 | 0.51 |

|                   |         |      |
|-------------------|---------|------|
| <i>GFOD2</i>      | -0.2413 | 0.51 |
| <i>TRMO</i>       | -0.2415 | 0.51 |
| <i>DPP3</i>       | -0.2417 | 0.51 |
| <i>ZNF318</i>     | -0.2429 | 0.51 |
| <i>FBXO42</i>     | -0.2431 | 0.51 |
| <i>LTBP4</i>      | -0.2432 | 0.51 |
| <i>SNORD104</i>   | -0.2434 | 0.51 |
| <i>ZHX1</i>       | -0.2437 | 0.51 |
| <i>BCL2L11</i>    | -0.2441 | 0.51 |
| <i>BAHD1</i>      | -0.2442 | 0.51 |
| <i>NCAM1</i>      | -0.2444 | 0.51 |
| <i>DDX52</i>      | -0.2444 | 0.51 |
| <i>BMP2K</i>      | -0.2448 | 0.51 |
| <i>TLL5</i>       | -0.2449 | 0.51 |
| <i>UBE2E3</i>     | -0.2449 | 0.51 |
| <i>LPAR5</i>      | -0.2459 | 0.51 |
| <i>WDR92</i>      | -0.2460 | 0.51 |
| <i>TCF19</i>      | -0.2464 | 0.51 |
| <i>UBASH3B</i>    | -0.2464 | 0.50 |
| <i>SUMO1</i>      | -0.2471 | 0.50 |
| <i>CALCOCO1</i>   | -0.2476 | 0.50 |
| <i>PRKCE</i>      | -0.2478 | 0.50 |
| <i>MYO1C</i>      | -0.2482 | 0.50 |
| <i>AC006504.5</i> | -0.2486 | 0.50 |
| <i>STK26</i>      | -0.2498 | 0.50 |
| <i>PLCD3</i>      | -0.2500 | 0.50 |
| <i>PSMA5</i>      | -0.2500 | 0.50 |
| <i>CDC40</i>      | -0.2500 | 0.50 |
| <i>STN1</i>       | -0.2501 | 0.50 |
| <i>RNF4</i>       | -0.2503 | 0.50 |
| <i>DSN1</i>       | -0.2506 | 0.50 |
| <i>SLC12A2</i>    | -0.2508 | 0.50 |
| <i>SMAD5</i>      | -0.2513 | 0.50 |
| <i>SAMD3</i>      | -0.2518 | 0.50 |
| <i>FXR2</i>       | -0.2523 | 0.50 |
| <i>GLT8D1</i>     | -0.2525 | 0.50 |
| <i>MAP2K4</i>     | -0.2533 | 0.50 |
| <i>CASK</i>       | -0.2537 | 0.49 |
| <i>SLF1</i>       | -0.2539 | 0.49 |
| <i>CAB39</i>      | -0.2546 | 0.49 |
| <i>HIC2</i>       | -0.2554 | 0.49 |
| <i>TXLNGY</i>     | -0.2554 | 0.49 |
| <i>TRAPPC10</i>   | -0.2556 | 0.49 |
| <i>MON2</i>       | -0.2560 | 0.49 |
| <i>CMC2</i>       | -0.2567 | 0.49 |
| <i>AC245128.3</i> | -0.2579 | 0.49 |
| <i>C4orf32</i>    | -0.2585 | 0.49 |
| <i>NDEL1</i>      | -0.2586 | 0.49 |

|                        |         |      |
|------------------------|---------|------|
| <i>PPP1R3E</i>         | -0.2601 | 0.49 |
| <i>NUDT1</i>           | -0.2602 | 0.49 |
| <i>MTPAP</i>           | -0.2605 | 0.49 |
| <i>HLA-DOB</i>         | -0.2615 | 0.48 |
| <i>BICRA</i>           | -0.2620 | 0.48 |
| <i>CNPY4</i>           | -0.2624 | 0.48 |
| <i>AC010969.2</i>      | -0.2625 | 0.48 |
| <i>COPS8</i>           | -0.2627 | 0.48 |
| <i>GRWD1</i>           | -0.2628 | 0.48 |
| <i>TMEM129</i>         | -0.2631 | 0.48 |
| <i>ETF1</i>            | -0.2634 | 0.48 |
| <i>MFSD14B</i>         | -0.2644 | 0.48 |
| <i>TEX10</i>           | -0.2647 | 0.48 |
| <i>HAPLN3</i>          | -0.2648 | 0.48 |
| <i>CDC37L1</i>         | -0.2652 | 0.48 |
| <i>TMEM70</i>          | -0.2664 | 0.48 |
| <i>RPP14</i>           | -0.2664 | 0.48 |
| <i>ENSG00000244567</i> | -0.2670 | 0.48 |
| <i>ATR</i>             | -0.2685 | 0.47 |
| <i>TMEM57</i>          | -0.2688 | 0.47 |
| <i>HTATSF1</i>         | -0.2709 | 0.47 |
| <i>MRPS11</i>          | -0.2717 | 0.47 |
| <i>AP000936.3</i>      | -0.2729 | 0.47 |
| <i>CAMP</i>            | -0.2747 | 0.47 |
| <i>TRMT10C</i>         | -0.2760 | 0.47 |
| <i>SMYD2</i>           | -0.2764 | 0.46 |
| <i>TTC9C</i>           | -0.2768 | 0.46 |
| <i>USP24</i>           | -0.2810 | 0.46 |
| <i>TIFA</i>            | -0.2816 | 0.46 |
| <i>COL18A1</i>         | -0.2830 | 0.46 |
| <i>ABHD14A</i>         | -0.2841 | 0.45 |
| <i>CUL3</i>            | -0.2888 | 0.45 |
| <i>THRA</i>            | -0.2904 | 0.45 |
| <i>NOL10</i>           | -0.2913 | 0.45 |
| <i>AKAP1</i>           | -0.2915 | 0.45 |
| <i>HDAC8</i>           | -0.2922 | 0.44 |
| <i>MFN1</i>            | -0.2943 | 0.44 |
| <i>NEK8</i>            | -0.2955 | 0.44 |
| <i>ITPRIPL1</i>        | -0.2956 | 0.44 |
| <i>NXT1</i>            | -0.2970 | 0.44 |
| <i>POLD3</i>           | -0.2993 | 0.44 |
| <i>MINK1</i>           | -0.3008 | 0.43 |
| <i>FAM214A</i>         | -0.3040 | 0.43 |
| <i>PROSER1</i>         | -0.3041 | 0.43 |
| <i>AMIGO1</i>          | -0.3049 | 0.43 |
| <i>GUSB</i>            | -0.3061 | 0.43 |
| <i>CDR2</i>            | -0.3078 | 0.43 |
| <i>SPAST</i>           | -0.3079 | 0.43 |



|                   |         |      |
|-------------------|---------|------|
| <i>EXOSC7</i>     | -0.3088 | 0.42 |
| <i>TDG</i>        | -0.3134 | 0.42 |
| <i>UBE2Q2</i>     | -0.3156 | 0.42 |
| <i>GCDH</i>       | -0.3161 | 0.42 |
| <i>EGLN1</i>      | -0.3163 | 0.42 |
| <i>ZHX3</i>       | -0.3167 | 0.42 |
| <i>PARP4</i>      | -0.3184 | 0.41 |
| <i>FAM193A</i>    | -0.3200 | 0.41 |
| <i>DEFA3</i>      | -0.3208 | 0.41 |
| <i>TOR1B</i>      | -0.3236 | 0.41 |
| <i>THOP1</i>      | -0.3287 | 0.40 |
| <i>COG5</i>       | -0.3298 | 0.40 |
| <i>POLR3D</i>     | -0.3354 | 0.39 |
| <i>FOS</i>        | -0.3361 | 0.39 |
| <i>RAB11B-AS1</i> | -0.3454 | 0.38 |
| <i>ITGAE</i>      | -0.3504 | 0.38 |
| <i>MTRF1</i>      | -0.3522 | 0.38 |
| <i>ZNF551</i>     | -0.3572 | 0.37 |
| <i>NIF3L1</i>     | -0.3613 | 0.37 |
| <i>CTNND1</i>     | -0.3745 | 0.35 |
| <i>CUL5</i>       | -0.4020 | 0.33 |
| <i>SCRN1</i>      | -0.4026 | 0.33 |
| <i>GFI1B</i>      | -0.4094 | 0.32 |
| <i>ATRN</i>       | -0.4129 | 0.32 |
| <i>ZNF333</i>     | -0.4502 | 0.29 |
